# Supplementary material for: In situ quantitative analysis of beryllium by EPMA: analytical conditions and further insights into beryllium geochemistry
Source: Royal Society of Chemistry journal article supplement (doi:10.1039/d2ja00103a), 2022-01-01
Supplement: d2ja00103a1.xlsx [file d2ja00103a1.xlsx]

## Sheet: 金绿宝
Beam Condition [ AccV: 10.0kV / BC: 100.0nA / Beam Size: MIN / SC: 87.4nA ]
Correction : [ ZAF3 ]
		1	2	3	4	5	6	7	8	9	10	11	12	13	14	15	16	17	18	19	20	21	22	23	24	25	26	27	28	29	30	31	32	33	34	35	36	37	38	39	40	41	42	43	44	45	46	47	48
1	Al2O3	80.173	79.571	80.968	80.28	80.329	79.634	80.164	79.459	81.269	80.749	80.337	79.731	79.358	79.712	81.113	79.362	80.876	79.865	77.918	78.382	79.43	79.669	79.756	78.809	80.315	80.287	80.07	79.746	80.428	78.782	80.721	79.604	80.144	78.643	78.344	79.086	80.289	80.712	78.36	80.151	79.101	79.642	81.306	81.254	77.202	80.765	80.192	81.869
2	BeO	19.786	20.465	20.233	20.076	20.566	20.194	20.115	19.711	20.108	20.632	18.609	19.474	20.844	19.048	20.304	20.115	19.935	19.084	20.708	20.363	19.875	20.688	20.368	20.652	19.361	20.664	20.295	19.653	20.544	19.343	20.033	19.231	18.676	19.861	20.02	19.574	19.045	18.338	19.39	19.538	20.852	20.564	18.535	19.784	19.861	20.404	19.938	18.943
	Total...	99.959	100.036	101.201	100.356	100.895	99.828	100.279	99.171	101.377	101.381	98.946	99.205	100.203	98.76	101.417	99.477	100.811	98.95	98.626	98.745	99.305	100.358	100.124	99.461	99.677	100.951	100.365	99.399	100.972	98.125	100.755	98.835	98.82	98.505	98.364	98.66	99.335	99.05	97.75	99.689	99.952	100.206	99.841	101.039	97.063	101.168	100.131	100.812
	阳离子
	Al	1.57264	1.56083	1.58823	1.57474	1.5757	1.56206	1.57246	1.55863	1.59413	1.58393	1.57585	1.56397	1.55665	1.56359	1.59107	1.55673	1.58643	1.56659	1.5284	1.5375	1.55806	1.56275	1.56446	1.54588	1.57542	1.57487	1.57062	1.56426	1.57764	1.54535	1.58339	1.56148	1.57207	1.54262	1.53676	1.55131	1.57491	1.58321	1.53707	1.5722	1.55161	1.56222	1.59486	1.59384	1.51436	1.58425	1.57301	1.6059
	Be	0.79106	0.818207	0.808932	0.802655	0.822245	0.807372	0.804214	0.788062	0.803934	0.824884	0.744003	0.778586	0.83336	0.761554	0.81177	0.804214	0.797017	0.762994	0.827923	0.814129	0.794619	0.827123	0.814329	0.825684	0.774068	0.826163	0.811411	0.785743	0.821366	0.773349	0.800936	0.768871	0.746682	0.794059	0.800416	0.782584	0.761435	0.733168	0.775228	0.781145	0.83368	0.822165	0.741044	0.79098	0.794059	0.815768	0.797137	0.757356
	ΣO	3.15001	3.15945	3.19128	3.16476	3.18579	3.15047	3.1629	3.12601	3.19514	3.20079	3.10778	3.12454	3.16833	3.10694	3.19838	3.13931	3.17666	3.11289	3.12053	3.12039	3.13171	3.17125	3.16101	3.1445	3.1372	3.18847	3.16733	3.13213	3.18782	3.09138	3.17601	3.11108	3.10478	3.108	3.10556	3.10956	3.1238	3.10798	3.08084	3.13945	3.16109	3.1655	3.13334	3.18174	3.0656	3.19214	3.15665	3.16621
O=4	系数	1.26984	1.26604	1.25342	1.26392	1.25558	1.26965	1.26466	1.27959	1.2519	1.24969	1.28709	1.28019	1.26249	1.28744	1.25063	1.27417	1.25919	1.28498	1.28183	1.28189	1.27726	1.26133	1.26542	1.27206	1.27502	1.25452	1.26289	1.27708	1.25477	1.29392	1.25944	1.28573	1.28833	1.287	1.28801	1.28636	1.28049	1.28701	1.29835	1.27411	1.26539	1.26363	1.27659	1.25717	1.3048	1.25308	1.26717	1.26334
	分子式
	Al	1.99699	1.97608	1.99071	1.99034	1.97841	1.98328	1.98863	1.9944	1.9957	1.97943	2.02827	2.00217	1.96526	2.01303	1.98985	1.98353	1.9976	2.01304	1.95916	1.97092	1.99005	1.97115	1.97969	1.96645	2.0087	1.97571	1.98352	1.99769	1.97958	1.99956	1.99418	2.00763	2.02535	1.98536	1.97937	1.99554	2.01666	2.0376	1.99566	2.00316	1.96338	1.97406	2.03599	2.00373	1.97594	1.98519	1.99326	2.0288
	Be	1.00452	1.03589	1.01393	1.01449	1.03239	1.02508	1.01706	1.00839	1.00645	1.03085	0.9576	0.996739	1.05211	0.980454	1.01523	1.0247	1.00359	0.980433	1.06126	1.04363	1.01493	1.04328	1.03047	1.05032	0.986954	1.03644	1.02472	1.00346	1.03063	1.00065	1.00873	0.988557	0.961976	1.02196	1.03095	1.00668	0.97501	0.943594	1.00652	0.995263	1.05493	1.03891	0.946013	0.994399	1.03609	1.02222	1.01011	0.956798
Data		Al2O3	BeO	Total...			Al	Be	ΣO				Al	Be
	1	80.173	19.786	99.959			1.57264	0.79106	3.15001	1.26984			1.99699	1.00452
	2	79.571	20.465	100.036			1.56083	0.818207	3.15945	1.26604			1.97608	1.03589
	3	80.968	20.233	101.201			1.58823	0.808932	3.19128	1.25342			1.99071	1.01393
	4	80.28	20.076	100.356			1.57474	0.802655	3.16476	1.26392			1.99034	1.01449
	5	80.329	20.566	100.895			1.5757	0.822245	3.18579	1.25558			1.97841	1.03239
	6	79.634	20.194	99.828			1.56206	0.807372	3.15047	1.26965			1.98328	1.02508
	7	80.164	20.115	100.279			1.57246	0.804214	3.1629	1.26466			1.98863	1.01706
	8	79.459	19.711	99.171			1.55863	0.788062	3.12601	1.27959			1.9944	1.00839
	9	81.269	20.108	101.377			1.59413	0.803934	3.19514	1.2519			1.9957	1.00645
	10	80.749	20.632	101.381			1.58393	0.824884	3.20079	1.24969			1.97943	1.03085
	11	80.337	18.609	98.946			1.57585	0.744003	3.10778	1.28709			2.02827	0.9576
	12	79.731	19.474	99.205			1.56397	0.778586	3.12454	1.28019			2.00217	0.996739
	13	79.358	20.844	100.203			1.55665	0.83336	3.16833	1.26249			1.96526	1.05211
	14	79.712	19.048	98.76			1.56359	0.761554	3.10694	1.28744			2.01303	0.980454
	15	81.113	20.304	101.417			1.59107	0.81177	3.19838	1.25063			1.98985	1.01523
	16	79.362	20.115	99.477			1.55673	0.804214	3.13931	1.27417			1.98353	1.0247
	17	80.876	19.935	100.811			1.58643	0.797017	3.17666	1.25919			1.9976	1.00359
	18	79.865	19.084	98.95			1.56659	0.762994	3.11289	1.28498			2.01304	0.980433
	19	77.918	20.708	98.626			1.5284	0.827923	3.12053	1.28183			1.95916	1.06126
	20	78.382	20.363	98.745			1.5375	0.814129	3.12039	1.28189			1.97092	1.04363
	21	79.43	19.875	99.305			1.55806	0.794619	3.13171	1.27726			1.99005	1.01493
	22	79.669	20.688	100.358			1.56275	0.827123	3.17125	1.26133			1.97115	1.04328
	23	79.756	20.368	100.124			1.56446	0.814329	3.16101	1.26542			1.97969	1.03047
	24	78.809	20.652	99.461			1.54588	0.825684	3.1445	1.27206			1.96645	1.05032
	25	80.315	19.361	99.677			1.57542	0.774068	3.1372	1.27502			2.0087	0.986954
	26	80.287	20.664	100.951			1.57487	0.826163	3.18847	1.25452			1.97571	1.03644
	27	80.07	20.295	100.365			1.57062	0.811411	3.16733	1.26289			1.98352	1.02472
	28	79.746	19.653	99.399			1.56426	0.785743	3.13213	1.27708			1.99769	1.00346
	29	80.428	20.544	100.972			1.57764	0.821366	3.18782	1.25477			1.97958	1.03063
	30	78.782	19.343	98.125			1.54535	0.773349	3.09138	1.29392			1.99956	1.00065
	31	80.721	20.033	100.755			1.58339	0.800936	3.17601	1.25944			1.99418	1.00873
	32	79.604	19.231	98.835			1.56148	0.768871	3.11108	1.28573			2.00763	0.988557
	33	80.144	18.676	98.82			1.57207	0.746682	3.10478	1.28833			2.02535	0.961976
	34	78.643	19.861	98.505			1.54262	0.794059	3.108	1.287			1.98536	1.02196
	35	78.344	20.02	98.364			1.53676	0.800416	3.10556	1.28801			1.97937	1.03095
	36	79.086	19.574	98.66			1.55131	0.782584	3.10956	1.28636			1.99554	1.00668
	37	80.289	19.045	99.335			1.57491	0.761435	3.1238	1.28049			2.01666	0.97501
	38	80.712	18.338	99.05			1.58321	0.733168	3.10798	1.28701			2.0376	0.943594
	39	78.36	19.39	97.75			1.53707	0.775228	3.08084	1.29835			1.99566	1.00652
	40	80.151	19.538	99.689			1.5722	0.781145	3.13945	1.27411			2.00316	0.995263
	41	79.101	20.852	99.952			1.55161	0.83368	3.16109	1.26539			1.96338	1.05493
	42	79.642	20.564	100.206			1.56222	0.822165	3.1655	1.26363			1.97406	1.03891
	43	81.306	18.535	99.841			1.59486	0.741044	3.13334	1.27659			2.03599	0.946013
	44	81.254	19.784	101.039			1.59384	0.79098	3.18174	1.25717			2.00373	0.994399
	45	77.202	19.861	97.063			1.51436	0.794059	3.0656	1.3048			1.97594	1.03609
	46	80.765	20.404	101.168			1.58425	0.815768	3.19214	1.25308			1.98519	1.02222
	47	80.192	19.938	100.131			1.57301	0.797137	3.15665	1.26717			1.99326	1.01011
	48	81.869	18.943	100.812			1.6059	0.757356	3.16621	1.26334			2.0288	0.956798
	49	79.267	18.693	97.96			1.55486	0.747361	3.07966	1.29885			2.01953	0.970707
	50	80.847	19.754	100.601			1.58586	0.789781	3.16857	1.2624			2.00199	0.99702
	51	80.46	20.079	100.539			1.57827	0.802775	3.17017	1.26176			1.99139	1.01291
	52	80.29	18.513	98.804			1.57493	0.740165	3.10256	1.28926			2.03049	0.954263
	53	81.162	20.473	101.635			1.59204	0.818527	3.20658	1.24743			1.98596	1.02106
	54	81.249	18.139	99.389			1.59374	0.725212	3.11583	1.28377			2.046	0.931004
	55	77.194	20.671	97.865			1.5142	0.826443	3.09775	1.29126			1.95523	1.06715
	56	77.34	18.403	95.743			1.51707	0.735767	3.01137	1.3283			2.01512	0.97732
	57	80.478	19.748	100.225			1.57862	0.789541	3.15747	1.26684			1.99985	1.00022
	58	79.706	20.126	99.832			1.56348	0.804654	3.14987	1.26989			1.98545	1.02183
	59	78.283	19.73	98.014			1.53556	0.788821	3.09217	1.29359			1.98639	1.02041
	60	79.979	20.527	100.506			1.56883	0.820686	3.17393	1.26027			1.97714	1.03428
	61	81.261	19.437	100.697			1.59398	0.777107	3.16807	1.2626			2.01255	0.981173
	62	80.62	19.679	100.3			1.5814	0.786782	3.15889	1.26627			2.00248	0.996277
	63	80.532	20.502	101.034			1.57968	0.819687	3.1892	1.25423			1.98128	1.02808
	64	78.565	20.56	99.124			1.54109	0.822005	3.13365	1.27647			1.96716	1.04926
	65	80.819	19.54	100.359			1.58531	0.781225	3.15919	1.26615			2.00724	0.989147
	66	79.888	20.085	99.973			1.56705	0.803015	3.15358	1.2684			1.98764	1.01854
	67	78.124	18.688	96.812			1.53244	0.747161	3.04583	1.31327			2.01252	0.981226
	68	79.451	20.215	99.665			1.55847	0.808212	3.14592	1.27149			1.98158	1.02763
	69	77.644	20.367	98.47			1.52303	0.814289	3.09883	1.29081			1.96594	1.05109
	70	79.428	19.837	99.74			1.55802	0.793099	3.13013	1.2779			1.991	1.0135
	71	79.285	20.108	99.935			1.55522	0.803934	3.13676	1.2752			1.98322	1.02518
Average		79.8	19.8348	99.6557			1.56532	0.793013	3.14099	1.27367			1.99348	1.00978
[truncated: 24 more columns]

## Sheet: S1 (Beryl)
		Fulishi (FLS) quartzite veins, Fujian frovince, China																							Zhangji (ZJ)granite porphyry
		1	2	3	4	5	6	7	8	9	10	11	12	13	14	15	16	17	18	19	Range/wt.%	Average	SD	RSD	20	21	22	23	24	25	26	27	28	29	30	31	32	33	34	35	36	37	38	39	40	41	42	43	44
	SiO2 wt.%	67.37	66.848	66.422	66.762	67.515	67.061	66.737	66.59	67.206	66.924	66.313	66.31	65.954	66.57	66.208	66.613	67.153	65	65.419	65.00-67.52	66.5776	0.63433	0.00952767	66.662	66.395	66.27	66.097	66.737	67.033	66.769	66.875	66.956	66.529	66.585	66.567	66.421	66.787	66.681	66.338	66.821	66.258	66.385	66.641	66.663	66.884	66.769	66.511	66.285
	Al2O3	18.718	18.517	18.155	18.197	18.933	18.593	18.337	18.185	18.3	18.176	17.968	18.621	18.48	18.635	18.525	18.781	18.685	18.112	18.079	17.97-18.93	18.4209	0.275333	0.0149468	17.592	17.031	16.652	17.138	17.824	17.963	17.76	17.696	17.785	18.403	18.414	18.532	18.474	18.195	18.4	17.829	18.683	18.578	18.536	18.524	18.592	18.687	18.646	18.433	17.287
	BeO	14.97	14.044	14.188	12.628	13.769	14	14.388	14.267	12.251	13.724	14.448	13.948	13.96	13.632	13.058	14.455	14.82	13.662	13.199	12.25-14.97	13.8637	0.698459	0.0503803	13.073	11.366	13.666	14.012	13.473	13.346	13.653	14.763	14.074	14.276	13.703	14.526	14.679	13.901	13.471	14.121	13.649	14.738	14.726	13.884	14.354	13.539	14.893	14.244	13.37
	Na2O	0.029	0.073	0.271	0.1	0.038	0.109	0.1	0.132	0.023	0.027	0.049	0.112	0.11	0.018	0.117	0.058	0.413	0.166	0.173	0.02-0.41	0.111474	0.0966071	0.866636	0.043	0.051	0.05	0.035	0.032	0.009	0.025	0.024	0.02	0.096	0.087	0.077	0.142	0.104	0.147	0.296	0.049	0.055	0.101	0.093	0.074	0.074	0.065	0.126	0.296
	K2O	0.007	0.033	0.01	0.027	0.012	0.005	0.029	0.032	0.025	0.023	0.021	0.006	0.03	0.008	0.01	0.01	0.007	0.017	0.003	0.00-0.03	0.0165789	0.0103297	0.623059	0.003	0.007	0.004	0	0.009	0	0	0.006	0	0.01	0.01	0.002	0	0.019	0	0	0	0.007	0.006	0.022	0.002	0.017	0.008	0.003	0
	FeOa	0.638	0.71	1.355	1.475	0.108	0.755	0.831	1.374	1.461	1.785	1.511	0.778	0.897	0.685	0.62	0.666	0.372	0.499	0.727	0.11-1.79	0.907737	0.450558	0.496353	2.435	3.246	3.81	3.187	1.972	2.043	2.579	2.237	2.16	1.073	1.256	0.951	1.016	1.09	1.124	2.349	0.624	0.978	0.79	0.95	1.011	1.396	1.379	1.448	2.373
	CaO	0	0	0	0	0	0	0	0	0	0	0	0.002	0	0	0	0.004	0.007	0.003	0.007	0.00-0.01	0.00121053	0.00234708	1.93889	0	0	0	0	0	0.002	0.002	0	0.003	0	0	0	0.002	0.001	0	0	0.004	0	0	0.001	0	0	0	0	0.003
	Cs2O	0.039	0.019	0.062	0	0.009	0	0	0.006	0	0.004	0.008	0	0	0	0	0	0	0	0	0.00-0.06	0.00773684	0.0163056	2.10752	0.005	0.009	0	0.03	0	0.006	0.041	0.014	0.019	0	0.006	0.005	0.005	0	0	0	0.016	0	0	0.038	0	0	0	0	0.035
	MgO	0.014	0.009	0.013	0.011	0.001	0.005	0	0.01	0.023	0.02	0.021	0.006	0.008	0.009	0.01	0.007	0.039	0.175	0.138	0.00-0.18	0.0273158	0.0467892	1.7129	0.081	0.021	0.007	0.042	0.006	0.012	0.031	0.029	0.002	0.019	0.013	0.028	0.074	0.081	0.083	0.041	0.006	0.023	0.007	0.012	0.004	0.02	0.004	0.008	0.411
	Total	101.784	100.252	100.475	99.2	100.383	100.528	100.421	100.595	99.289	100.682	100.339	99.782	99.437	99.559	98.549	100.593	101.497	97.633	97.744	97.63-101.78	99.9338	1.10605	0.0110678	99.893	98.125	100.458	100.541	100.053	100.414	100.862	101.645	101.017	100.405	100.075	100.687	100.814	100.18	99.906	100.974	99.851	100.638	100.551	100.166	100.699	100.617	101.764	100.775	100.061
	Structural formulas calculated on the basis of O = 18 atoms
	Si apfu	5.93373	6.01859	5.96494	6.08863	6.02482	5.99464	5.96884	5.9665	6.12667	6.00875	5.95561	5.97357	5.96625	6.01859	6.04421	5.94244	5.93495	5.98609	6.02903		5.9972	0.0512195	0.00854056	6.06258	6.01859	6.02318	5.9827	6.03548	6.0449	6.01131	5.94732	5.99617	5.96128	5.99916	5.9415	5.92556	6.00584	6.02095	5.95924	6.01859	5.91469	5.92499	5.98914	5.95221	6.00227	5.90592	5.95141	6.03826
	Al	1.94302	2.01689	1.92153	1.9559	1.99122	1.95884	1.93289	2.01066	1.96618	1.92334	1.90188	1.97703	1.97024	2.01689	1.99317	1.97461	1.94626	1.96586	1.96369		1.96474	0.0323282	0.0164542	1.8856	2.01689	2.01066	1.82823	1.89979	1.90913	1.88449	2.01066	1.87713	1.94345	1.95532	1.94946	1.94241	1.92837	1.95811	1.88761	2.01689	1.95456	1.9498	2.01066	1.95648	1.97647	1.94381	1.94392	1.85598
	Be	3.16741	2.91088	3.06081	2.7666	2.95167	3.00637	3.09133	2.90189	2.68293	2.96009	3.11714	3.01848	3.03366	2.91088	2.8637	3.09774	3.14645	3.02249	2.92217		2.98067	0.126666	0.0424957	2.85612	2.91088	2.90189	3.04675	2.92705	2.89117	2.95287	2.90189	3.02777	3.07296	2.96586	3.11462	3.14588	3.00296	2.92203	3.0473	2.91088	3.16048	3.15736	2.90189	3.07884	2.91878	3.16458	3.06182	2.92583
	Na	0.0049523	0.00818594	0.0471858	0.0176823	0.00657468	0.0188915	0.0173409	0.00816066	0.00406529	0.00470017	0.00853241	0.0195623	0.019293	0.00818594	0.0207092	0.0100319	0.07077	0.0296405	0.0309127		0.0187041	0.0167606	0.896091	0.00758221	0.00818594	0.00816066	0.00614231	0.00561103	0.00157359	0.00436397	0.00816066	0.00347266	0.0166782	0.0151978	0.0133253	0.0245618	0.0181327	0.0257352	0.0515546	0.00818594	0.00951929	0.0174778	0.00816066	0.0128107	0.0128758	0.0111474	0.0218597	0.0522801
	K	0.000393268	0.00614725	0.000572826	0.00157066	0.000683051	0.000285096	0.00165444	0.00612826	0.00145373	0.00131722	0.00120303	0.000344774	0.00173105	0.00614725	0.000582315	0.000569029	0.000394619	0.000998636	0.000176357		0.00170278	0.00203492	1.19505	0.000174032	0.00614725	0.00612826	0	0.000519178	0	0	0.00612826	0	0.000571554	0.000574702	0.000113866	0	0.00108984	0	0	0.00614725	0.000398585	0.000341584	0.00612826	0.000113907	0.00097313	0.000451368	0.000171229	0
	Fe	0.0469949	0.0171941	0.101766	0.1125	0.00806001	0.0564427	0.0621573	0.017141	0.111387	0.134032	0.113491	0.0586141	0.0678611	0.0171941	0.0473357	0.0496876	0.0274955	0.0384325	0.0560333		0.060201	0.0378125	0.628104	0.185202	0.0171941	0.017141	0.241249	0.149149	0.154077	0.194184	0.017141	0.161773	0.0804075	0.0946394	0.0709881	0.0758029	0.0819741	0.0848785	0.176473	0.0171941	0.0730131	0.0589675	0.017141	0.0754941	0.104772	0.102011	0.108358	0.180785
	Ca	0	0.00216351	0	0	0	0	0	0.00215683	0	0	0	0.000193045	0	0.00216351	0	0.000382331	0.000662861	0.000296022	0.000691217		0.000458385	0.000789144	1.72157	0	0.00216351	0.00215683	0	0	0.000193243	0.000192929	0.00215683	0.000287858	0	0	0	0.000191173	9.63507e-05	0	0	0.00216351	0	0	0.00215683	0	0	0	0	0.000292813
	Cs	0.00146474	0	0.00237422	0	0.000342468	0	0	0	0	0.000153143	0.000306374	0	0	0	0	0	0	0	0		0.00024426	0.000618393	2.5317	0.000193903	0	0	0.0011579	0	0.00023072	0.00157403	0	0.000725559	0	0.000230515	0.000190301	0.000190208	0	0	0	0	0	0	0	0	0	0	0	0.00135956
	Mg	0.000190525	8.50895e-05	0.000180385	0.000155005	1.37881e-05	6.90597e-05	0	8.48267e-05	0.000323971	0.000277456	0.000291413	8.35156e-05	0.000111818	8.50895e-05	0.000141056	9.64863e-05	0.000532571	0.00249017	0.0019651		0.000377754	0.000669576	1.77252	0.00113822	8.50895e-05	8.48267e-05	0.00058739	8.38413e-05	0.000167203	0.000431239	8.48267e-05	2.76743e-05	0.000263054	0.000180975	0.000386151	0.00102004	0.00112546	0.00115798	0.000569081	8.50895e-05	0.000317237	9.65333e-05	8.48267e-05	5.51843e-05	0.000277323	5.46681e-05	0.000110606	0.00578496
	FeOa : Total iron
	SD=Standard Deviation
	RSD=Relative Standard Deviation
	apfu=Atoms per formula unit
[truncated: 59 more columns]

## Sheet: S2 (Phenakite)
	Qingtian(QT) granite porphyry (Zhejiang Province)
		1	2	3	4	5	6	7	8	9	10	11	12	13	14	15	16	17	18	19	20	21	22	23	24	25	26	27	28	29	Range/wt.%	Average	SD	RSD
	SiO2 wt.%	54.736	54.691	54.326	54.662	54.54	54.442	53.932	53.815	55.254	54.103	54.933	55.534	55.739	56.372	56.211	55.182	56.484	55.952	56.104	54.966	55.379	55.605	55.498	55.583	55.426	56.122	52.401	52.724	52.795	52.40-56.48	54.9487	1.07696	0.0195993
	BeO	44.167	45.634	43.668	45.983	46.239	47.771	43.759	46.294	44.833	46.309	45.36	44.944	44.319	46.142	43.955	45.505	45.978	44.953	47.213	46.271	45.944	42.407	45.745	42.769	46.84	44.257	43.324	46.055	45.72	42.41-47.77	45.2537	1.31453	0.0290479
	Total	98.903	100.325	97.994	100.645	100.779	102.213	97.691	100.109	100.087	100.412	100.293	100.478	100.058	102.514	100.166	100.687	102.462	100.905	103.317	101.237	101.323	98.012	101.243	98.352	102.266	100.378	95.725	98.779	98.515	95.73-103.32	100.202	1.68343	0.0168003
	Structural formulas calculated on the basis of O = 4 atoms
	Si apfu	1.01564	0.998894	1.01756	0.99482	0.990927	0.973736	1.01288	0.983643	1.01287	0.986149	1.00411	1.01416	1.023	1.0085	1.03133	1.00478	1.01127	1.01781	0.99464	0.994471	1.00176	1.04382	1.005	1.03938	0.992527	1.02712	1.00348	0.975993	0.980314		1.00554	0.017777	0.0176791
	Be	1.96872	2.00221	1.96487	2.01036	2.01815	2.05253	1.97423	2.03271	1.97426	2.0277	1.99177	1.97168	1.954	1.98301	1.93733	1.99044	1.97746	1.96438	2.01072	2.01106	1.99648	1.91235	1.98999	1.92123	2.01495	1.94576	1.99304	2.04801	2.03937		1.98892	0.035554	0.017876
	SD=Standard Deviation
	RSD=Relative Standard Deviation
	apfu=Atoms per formula unit

## Sheet: S3(Bertrandite)
		Dawan (DW) Be-Mo deposit (Fujian Province)													Qingtian(QT) granite porphyry (Zhejiang Province)
		1	2	3	4	5	6	7	8	9	Range/wt.%	Average	SD	RSD	10	11	12	13	14	15	16	17	18	19	20	21	22	23	24	25	26	27	28	29	30	31	32	33	34	35	36	37	38	39	Range/wt.%	Average	SD	RSD
	SiO2 wt.%	48.702	50.648	48.517	48.582	45.589	48.261	49.369	49.381	48.236	45.59-50.65	48.5872	1.35671	0.0279232	48.118	49.4	48.836	47.79	49.642	51.39	50.512	49.901	50.264	51.42	52.307	52.579	50.966	50.726	50.507	52.909	53.418	51.695	49.956	51.224	50.087	50.069	50.852	50.504	50.053	50.425	49.954	52.974	51.303	48.262	47.79-53.42	50.6014	1.39775	0.0276227
	BeO	41.168	43.864	42.752	41.559	44.475	44.089	40.57	42.381	42.041	40.57-44.48	42.5443	1.36662	0.0321224	42.471	39.538	44.419	42.959	40.427	39.439	42.527	42.647	43.008	42.386	39.964	39.006	41.542	41.329	41.884	39.306	39.39	40.285	41.06	41.16	39.803	39.973	40.427	40.394	41.626	41.536	43.684	39.66	40.252	43.066	39.01-44.42	41.1723	1.46952	0.035692
	H2O*	7.35083	7.73909	7.47946	7.37701	7.41517	7.58056	7.34699	7.5108	7.39446	7.35-7.74	7.46604	0.12891	0.0172662	7.4243	7.25647	7.65331	7.44363	7.35457	7.3966	7.60863	7.57367	7.63333	7.66395	7.51251	7.4467	7.55403	7.51689	7.55042	7.4984	7.54408	7.49555	7.43503	7.53899	7.33176	7.34571	7.44519	7.41616	7.49321	7.51297	7.67092	7.53512	7.46322	7.48861	7.26-7.67	7.49346	0.100842	0.0134573
	Total	97.2208	102.251	98.7485	97.518	97.4792	99.9306	97.286	99.2728	97.6715	97.22-102.25	98.5976	1.67681	0.0170066	98.0133	96.1945	100.908	98.1926	97.4236	98.2256	100.648	100.122	100.905	101.47	99.7835	99.0317	100.062	99.5719	99.9414	99.7134	100.352	99.4756	98.451	99.923	97.2218	97.3877	98.7242	98.3142	99.1722	99.474	101.309	100.169	99.0182	98.8166	96.19-101.47	99.2672	1.28321	0.0129268
	Structural formulas calculated on the basis of O = 9 atoms
	Si apfu	1.9848	1.96055	1.94326	1.97288	1.84181	1.90722	2.01304	1.96961	1.95421		1.94971	0.0497508	0.025517	1.94159	2.03943	1.9116	1.92335	2.02208	2.08139	1.98881	1.97383	1.97265	2.00995	2.08584	2.11522	2.0212	2.02162	2.00395	2.11382	2.12123	2.0661	2.01285	2.03548	2.04655	2.04193	2.04616	2.04011	2.0011	2.01067	1.95087	2.1061	2.05931	1.93068		2.02318	0.057564	0.0284522
	Be	4.0304	4.07889	4.11349	4.05423	4.31637	4.18555	3.97393	4.06078	4.09158		4.10058	0.0995015	0.0242652	4.11681	3.92115	4.1768	4.1533	3.95584	3.83723	4.02237	4.05234	4.05471	3.9801	3.82832	3.76957	3.95761	3.95677	3.9921	3.77237	3.75754	3.8678	3.9743	3.92904	3.90689	3.91613	3.90769	3.91978	3.9978	3.97866	4.09825	3.7878	3.88137	4.13864		3.95364	0.115128	0.0291195
	OH	2	2	2	2	2	2	2	2	2		2	0	0	2	2	2	2	2	2	2	2	2	2	2	2	2	2	2	2	2	2	2	2	2	2	2	2	2	2	2	2	2	2		2	0	0
	* calucated by 2 (OH)
	SD=Standard Deviation
	RSD=Relative Standard Deviation
	apfu=Atoms per formula unit

## Sheet: S4 (Hsianghualite)
			Xianghualing skarn, (Hunan Province), southern China
		1	2	3	4	5	6	7	8	9	10	11	12	13	14	15	16	17	18	19	20	21	22	23	24	25	26	27	28	29	30	31	32	33	34	35	36	37	38	39	40	41	42	43	44	45	46	47	48
	SiO2 wt.%	37.143	37.735	37.285	37.292	37.392	37.572	37.1	37.075	36.887	37.641	37.337	37.556	37.087	37.182	37.586	37.24	36.98	37.076	37.18	37.271	37.339	37.202	37.16	37.217	37.198	37.312	37.219	37.247	37.243	37.232	37.378	37.311	37.427	37.266	37.318	37.296	37.379	37.247	37.458	37.516	37.473	36.887	36.978	36.957	37.565	36.768	36.974	37.58
	CaO	32.704	32.797	33.019	33.466	32.955	33.105	33.392	32.897	33.132	33.205	32.562	32.451	33.065	33.469	32.655	33.207	33.106	32.601	32.618	33.372	32.536	33.236	32.389	32.545	33.073	33.129	32.354	33.242	33.259	33.094	33.128	33.124	33.113	33.147	33.063	32.909	32.914	32.682	33.118	32.355	32.913	32.928	32.436	32.926	32.694	32.769	32.88	32.916
	BeO	16.493	16.517	16.519	15.694	15.51	16.177	15.355	15.813	16.59	16.347	16.247	16.603	16.387	16.586	15.212	15.888	16.433	15.96	16.058	16	15.826	15.18	16.151	16.222	15.524	16.036	16.409	15.937	15.756	16.196	16.433	16.317	16.562	16.559	16.244	15.995	15.897	16.44	15.778	16.187	16.561	16.174	16.451	15.505	16.331	16.558	16.569	16.439
	Al2O3	0.006	0.009	0.026	0.005	0.011	0.026	0.016	0.021	0.016	0.017	0.003	0.016	0.024	0.014	0.019	0.008	0.019	0.009	0.013	0.015	0.014	0.032	0.029	0.017	0.007	0.01	0.004	0.024	0.014	0	0.013	0.004	0.002	0.008	0.024	0.016	0.013	0.085	0.1	0	0.029	0.02	0.008	0.013	0.008	0.013	0.015	0.015
	FeOa	0	0	0	0	0.003	0	0	0.038	0	0.028	0.003	0	0	0.001	0.042	0.009	0	0	0	0	0.018	0	0.016	0	0.026	0.021	0.006	0	0.003	0.006	0.036	0	0.014	0	0	0	0.067	0	0	0	0	0	0	0	0	0	0	0.018
	Na2O	0.064	0.068	0.067	0.061	0.045	0	0.026	0.063	0.055	0.052	0.032	0.06	0.046	0.044	0.039	0.034	0.066	0.059	0.053	0.048	0.035	0.072	0.047	0.048	0.05	0.029	0.058	0.024	0.039	0.069	0.055	0.039	0.067	0.063	0.028	0.068	0.082	0.134	0.158	0.03	0.023	0.067	0.064	0.071	0.072	0.071	0.061	0.074
	F	4.2833	4.31172	4.33202	4.39234	4.3036	4.31346	4.3239	4.32912	4.3094	4.35232	4.24618	4.28794	4.30476	4.33608	4.26706	4.32854	4.38132	4.31288	4.31868	4.30998	4.34246	4.13308	4.31578	4.36334	4.30708	4.3326	4.22356	4.37088	4.36276	4.27808	4.23458	4.30708	4.31694	4.2021	4.31984	4.2717	4.29026	4.12786	4.2978	4.28736	4.33318	4.35232	4.26706	4.25082	4.20384	4.3152	4.28794	4.34652
	Li2O*	6.15743	6.25557	6.18097	6.18213	6.19871	6.22855	6.1503	6.14615	6.11499	6.23998	6.18959	6.22589	6.14814	6.16389	6.23087	6.17351	6.13041	6.14632	6.16356	6.17865	6.18992	6.16721	6.16025	6.1697	6.16655	6.18544	6.17003	6.17467	6.17401	6.17218	6.19639	6.18528	6.20451	6.17782	6.18644	6.18279	6.19655	6.17467	6.20965	6.21926	6.21213	6.11499	6.13007	6.12659	6.22739	6.09526	6.12941	6.22987
	H2O**	1.02344	0.910797	0.830339	0.591265	0.94298	0.903901	0.862522	0.841833	0.919992	0.749882	1.17056	1.00505	0.938383	0.814248	1.0878	0.844132	0.634942	0.906199	0.883212	0.917693	0.788961	1.61882	0.894706	0.706205	0.929187	0.828041	1.26021	0.676321	0.708504	1.04413	1.21654	0.929187	0.890108	1.34527	0.878614	1.06941	0.995852	1.63951	0.965968	1.00735	0.825742	0.749882	1.0878	1.15217	1.33837	0.897004	1.00505	0.77287
	Total	97.8742	98.6041	98.2593	97.6837	97.3613	98.3259	97.2257	97.2241	98.0244	98.6322	97.7903	98.2049	98.0003	98.6102	97.1387	97.7322	97.7507	97.0704	97.2875	98.1123	97.0893	97.6411	97.1627	97.2882	97.2808	97.8831	97.7038	97.6959	97.5593	98.0914	98.6905	98.2165	98.5966	98.7682	98.0619	97.8079	97.8347	98.53	98.0854	97.602	98.3701	97.2932	97.4219	97.0016	98.4396	97.4865	97.9214	98.3913
	Structural formulas calculated on the basis of Si = 3 atoms
	Si apfu	3	3	3	3	3	3	3	3	3	3	3	3	3	3	3	3	3	3	3	3	3	3	3	3	3	3	3	3	3	3	3	3	3	3	3	3	3	3	3	3	3	3	3	3	3	3	3	3
	Ca	2.83011	2.79363	2.84649	2.88448	2.83284	2.8321	2.893	2.85203	2.88705	2.83545	2.80318	2.77733	2.86567	2.89327	2.79256	2.86615	2.87753	2.82629	2.81986	2.878	2.80079	2.87159	2.80157	2.81075	2.85781	2.8539	2.7941	2.86863	2.87041	2.85701	2.84878	2.85355	2.84376	2.85898	2.84776	2.83617	2.8303	2.82031	2.84183	2.77207	2.82311	2.86927	2.81944	2.86366	2.79746	2.86466	2.85835	2.81533
	Be	3.20009	3.15447	3.19292	3.03289	2.98932	3.10293	2.98274	3.07377	3.24125	3.12979	3.13598	3.186	3.18432	3.21475	2.91675	3.07467	3.2025	3.10227	3.11258	3.09377	3.05455	2.94066	3.13229	3.14125	3.00762	3.09732	3.17729	3.08357	3.04888	3.13495	3.1684	3.15168	3.18909	3.20229	3.13699	3.09073	3.06497	3.1809	3.03561	3.10949	3.18498	3.15997	3.20618	3.02353	3.13306	3.24546	3.22953	3.15252
	Al	0.000571165	0.000843307	0.00246562	0.000474069	0.00104016	0.00244679	0.00152487	0.00200274	0.00153368	0.00159689	0.000284099	0.00150636	0.00228811	0.00133132	0.00178737	0.00075957	0.00181666	0.000858296	0.00123629	0.00142301	0.00132572	0.00304138	0.00275937	0.00161508	0.000665374	0.00094763	0.000379999	0.00227828	0.00132914	0	0.00122974	0.000379062	0.000188944	0.00075904	0.00227395	0.00151686	0.00122971	0.00806891	0.00943937	0	0.00273632	0.0019171	0.000764952	0.00124375	0.000752998	0.00125015	0.00143444	0.00141131
	Fe	0	0	0	0	0.000201281	0	0	0.00257136	0	0.0018662	0.000201578	0	0	6.74727e-05	0.00280339	0.000606308	0	0	0	0	0.0012094	0	0.0010802	0	0.00175353	0.00141199	0.000404433	0	0.000202086	0.000404292	0.00241628	0	0.000938434	0	0	0	0.00449684	0	0	0	0	0	0	0	0	0	0	0.00120165
	Na	0.00501117	0.00524083	0.00522608	0.00475718	0.00350001	0	0.00203815	0.00494191	0.00433636	0.0040177	0.00249256	0.0046463	0.00360721	0.00344156	0.00301769	0.00265525	0.00519054	0.00462802	0.00414574	0.00374547	0.0027261	0.00562862	0.00367839	0.0037509	0.00390918	0.0022604	0.0045321	0.00187394	0.00304548	0.00538975	0.0042794	0.00303993	0.00520626	0.00491658	0.0021821	0.00530252	0.00638002	0.0104628	0.0122673	0.00232563	0.00178503	0.00528247	0.00503353	0.00558724	0.00557423	0.00561596	0.0047981	0.00572678
	F	1.88628	1.86901	1.90047	1.92658	1.8826	1.87788	1.90637	1.90996	1.91095	1.89132	1.86022	1.86756	1.8986	1.90753	1.85698	1.90124	1.93796	1.90274	1.89997	1.89152	1.9023	1.81724	1.89972	1.91771	1.89395	1.89935	1.85618	1.91948	1.91612	1.87948	1.8531	1.88822	1.88667	1.84442	1.89346	1.87346	1.87742	1.81276	1.87675	1.8693	1.89145	1.92998	1.88752	1.8814	1.83049	1.91971	1.89696	1.89187
	Li	2	2	2	2	2	2	2	2	2	2	2	2	2	2	2	2	2	2	2	2	2	2	2	2	2	2	2	2	2	2	2	2	2	2	2	2	2	2	2	2	2	2	2	2	2	2	2	2
	OH	0.113715	0.130989	0.0995256	0.0734246	0.117396	0.122123	0.0936288	0.0900404	0.0890506	0.108678	0.139778	0.132438	0.101402	0.0924749	0.143015	0.0987576	0.0620445	0.0972566	0.100027	0.108484	0.0977006	0.182756	0.100281	0.0822879	0.106048	0.100647	0.143822	0.0805212	0.0838814	0.120518	0.146895	0.111784	0.113327	0.155582	0.106545	0.126541	0.122579	0.187244	0.123246	0.130699	0.108554	0.0700182	0.112482	0.118597	0.169505	0.0802855	0.103041	0.108133
	Li* and H2O** calucated by 2Li and 2 (OH)
	FeOa : total iron
	SD=Standard Deviation
	RSD=Relative Standard Deviation
	apfu=Atoms per formula unit
[truncated: 6 more columns]

## Sheet: S5 (Helvite)
							Dawan (DW) Be-Mo deposit Fujian frovince, China
		1	2	3	4	5	6	7	8	9	10	11	12	13	14	15	16	17	18	19	20	21	22	23	24	25	26	27	28	29	30	31	32	Range/wt.%	Average	SD	RSD
	SiO2 wt.%	30.342	30.257	30.813	31.102	30.979	30.892	30.184	30.461	29.966	30.887	30.753	31.14	31.225	31.143	31.132	30.447	31.082	30.085	30.091	30.809	30.459	30.184	30.584	30.887	30.651	30.75	30.176	30.563	30.661	30.575	30.495	30.599	29.97-31.23	30.6367	0.356892	0.0116492
	MnO	32.971	34.28	37.827	30.966	30.267	31.368	24.556	26.041	28.499	31.428	34.867	39.443	38.454	33.437	32.056	26.658	28.95	28.401	27.688	27.196	31.951	29.201	39.823	26.665	33.605	37.959	27.241	32.523	31.486	34.252	36.534	34.478	24.56-39.82	31.9085	4.16649	0.130576
	ZnO	17.582	17.392	13.315	8.339	9.356	8.45	25.522	23.537	21.808	18.499	12.759	9.452	2.467	14.843	18.007	22.442	6.307	21.504	20.904	7.322	16.168	19.426	10.192	6.897	17.851	12.947	21.86	15.624	19.358	17.028	14.16	17.045	2.47-25.52	15.2613	5.79453	0.379687
	FeOa	2.137	2.325	2.069	13.87	13.767	13.735	2.763	3.14	3.192	3.688	4.18	2.532	9.715	2.293	2.351	3.447	17.622	3.831	3.733	18.012	3.809	3.57	2.2	18.979	2.232	2.514	3.722	3.325	2.053	2.132	2.273	2.218	2.07-18.98	5.54466	5.37069	0.968625
	BeO	11.677	11.478	11.851	11.575	11.724	11.51	11.707	12.148	11.784	11.477	12.088	11.756	11.497	12.084	11.668	11.739	11.703	11.465	11.626	11.678	11.963	11.849	12.319	11.498	11.868	12.143	11.636	11.556	11.797	11.628	11.768	11.464	11.46-12.32	11.7414	0.225282	0.019187
	S	5.3669	5.17627	5.12072	5.43844	5.53636	5.2618	5.22423	5.19386	4.95846	5.711	5.54235	5.41846	5.66265	5.77095	5.1403	5.45323	5.33613	5.46881	5.54914	5.53316	5.66544	5.33573	5.0264	5.49639	5.25021	5.06397	5.3729	5.75656	5.13151	5.54035	5.51877	5.66784	4.96-5.67	5.39654	0.223143	0.0413493
	MgO	0.042	0.051	0	0.006	0.014	0.001	0.008	0.081	0.035	0.001	0.005	0.021	0.037	0.023	0.077	0.054	0.047	0.027	0.096	0.02	0.024	0.038	0.059	0.072	0.06	0.061	0.095	0	0	0	0	0	0.00-0.15	0.0329687	0.0303001	0.919055
	Cl	0.001	0	0.01	0.003	0.01	0.014	0.013	0	0	0	0	0.008	0.003	0.003	0	0	0.001	0	0.003	0.012	0	0.003	0.014	0.011	0.001	0	0.002	0	0.009	0.003	0	0	0.00-0.01	0.003875	0.00492361	1.27061
	Total	100.119	100.959	101.006	101.299	101.653	101.232	99.9772	100.602	100.242	101.691	100.194	99.7705	99.0606	99.597	100.431	100.24	101.048	100.782	99.6901	100.582	100.039	99.6067	100.217	100.505	101.518	101.438	100.105	99.3476	100.496	101.158	100.749	101.472	99.06-101.69	100.526	0.705321	0.00701631
	Structural formulas calculated on the basis of Si = 3 atoms
	Si apfu	3	3	3	3	3	3	3	3	3	3	3	3	3	3	3	3	3	3	3	3	3	3	3	3	3	3	3	3	3	3	3	3		3	1.12799e-16	3.75996e-17
	Mn	2.76111	2.8788	3.11935	2.52984	2.48255	2.5801	2.06717	2.17225	2.41656	2.58546	2.88087	3.21846	3.12921	2.72812	2.61637	2.22474	2.36666	2.39872	2.33804	2.24297	2.66542	2.4582	3.30854	2.19362	2.78583	3.13665	2.29381	2.7039	2.60932	2.84653	3.04414	2.86306		2.6452	0.33427	0.126369
	Zn	1.28334	1.27303	0.957025	0.593802	0.668866	0.605797	1.87264	1.71129	1.61177	1.32644	0.918852	0.672235	0.174978	1.05555	1.281	1.63243	0.449397	1.58302	1.53854	0.526342	1.17559	1.42535	0.738043	0.494539	1.28984	0.932482	1.60437	1.13217	1.39827	1.23343	1.02837	1.23369		1.10695	0.428002	0.386649
	Fe	0.176694	0.192778	0.168456	1.11879	1.11489	1.11543	0.229649	0.25861	0.267236	0.299554	0.340996	0.203988	0.78055	0.184716	0.189455	0.284025	1.42235	0.319465	0.31123	1.46671	0.31373	0.296724	0.180463	1.54155	0.182688	0.205107	0.309439	0.272933	0.167982	0.174937	0.186996	0.181851		0.451874	0.434086	0.960633
	Be	2.77349	2.73388	2.77179	2.68208	2.72739	2.68515	2.79517	2.87408	2.83402	2.67788	2.83273	2.7207	2.65351	2.79633	2.70102	2.7786	2.71348	2.74639	2.78441	2.73168	2.8305	2.82907	2.90282	2.68278	2.79043	2.8459	2.77895	2.7249	2.77284	2.7408	2.78108	2.70003		2.76231	0.0616134	0.022305
	S	0.996362	0.96367	0.936126	0.984971	1.00669	0.959457	0.974951	0.960468	0.932085	1.04154	1.01518	0.980154	1.02154	1.04382	0.930077	1.0089	0.967063	1.02395	1.03879	1.01166	1.04774	0.99576	0.925764	1.0024	0.964871	0.927648	1.00296	1.06097	0.942749	1.02072	1.01942	1.04339		0.992245	0.0398314	0.0401427
	Mg	0.00618984	0.00753735	0	0.000862656	0.00202086	0.000144753	0.00118519	0.0118909	0.00522293	0.000144777	0.000727038	0.00301561	0.00529875	0.00330249	0.0110601	0.00793092	0.00676182	0.00401318	0.0142662	0.00290287	0.00352347	0.00562965	0.00862645	0.0104239	0.00875349	0.00887073	0.0140779	0	0	0	0	0		0.00482449	0.00444878	0.922123
	Cl	0.000167582	0	0.0016502	0.00049046	0.00164136	0.00230437	0.00218997	0	0	0	0	0.0013063	0.000488528	0.000489815	0	0	0.000163592	0	0.000506939	0.0019805	0	0.000505377	0.00232758	0.00181087	0.000165892	0	0.000337007	0	0.00149254	0.000498914	0	0		0.000641181	0.000815128	1.27129
	FeOa : Total iron
	SD=Standard Deviation
	RSD=Relative Standard Deviation
	apfu=Atoms per formula unit

## Sheet: S6 (Chrysoberyl)
						Jiepailing (JPL) granite porphyry, Hunan province, China
		1	2	3	4	5	6	7	8	9	10	11	12	13	14	15	16	17	18	19	20	21	22	23	24	25	26	27	28	29	30	31	32	33	34	35	36	37	38	39	40	41	42	43	44	45	46	47	48
	Al2O3 wt.%	80.173	79.571	80.968	80.28	80.329	79.634	80.164	79.459	81.269	80.749	80.337	79.731	79.358	79.712	81.113	79.362	80.876	79.865	77.918	78.382	79.43	79.669	79.756	78.809	80.315	80.287	80.07	79.746	80.428	78.782	80.721	79.604	80.144	78.643	78.344	79.086	80.289	80.712	78.36	80.151	79.101	79.642	81.306	81.254	77.202	80.765	80.192	81.869
	BeO	19.786	20.465	20.233	20.076	20.566	20.194	20.115	19.711	20.108	20.632	18.609	19.474	20.844	19.048	20.304	20.115	19.935	19.084	20.708	20.363	19.875	20.688	20.368	20.652	19.361	20.664	20.295	19.653	20.544	19.343	20.033	19.231	18.676	19.861	20.02	19.574	19.045	18.338	19.39	19.538	20.852	20.564	18.535	19.784	19.861	20.404	19.938	18.943
	Total	99.959	100.036	101.201	100.356	100.895	99.828	100.279	99.171	101.377	101.381	98.946	99.205	100.203	98.76	101.417	99.477	100.811	98.95	98.626	98.745	99.305	100.358	100.124	99.461	99.677	100.951	100.365	99.399	100.972	98.125	100.755	98.835	98.82	98.505	98.364	98.66	99.335	99.05	97.75	99.689	99.952	100.206	99.841	101.039	97.063	101.168	100.131	100.812
	Structural formulas calculated on the basis of O = 4 atoms
	Al apfu	1.99699	1.97608	1.99071	1.99034	1.97841	1.98328	1.98863	1.9944	1.9957	1.97943	2.02827	2.00217	1.96526	2.01303	1.98985	1.98353	1.9976	2.01304	1.95916	1.97092	1.99005	1.97115	1.97969	1.96645	2.0087	1.97571	1.98352	1.99769	1.97958	1.99956	1.99418	2.00763	2.02535	1.98536	1.97937	1.99554	2.01666	2.0376	1.99566	2.00316	1.96338	1.97406	2.03599	2.00373	1.97594	1.98519	1.99326	2.0288
	Be	1.00452	1.03589	1.01393	1.01449	1.03239	1.02508	1.01706	1.00839	1.00645	1.03085	0.9576	0.996739	1.05211	0.980454	1.01523	1.0247	1.00359	0.980433	1.06126	1.04363	1.01493	1.04328	1.03047	1.05032	0.986954	1.03644	1.02472	1.00346	1.03063	1.00065	1.00873	0.988557	0.961976	1.02196	1.03095	1.00668	0.97501	0.943594	1.00652	0.995263	1.05493	1.03891	0.946013	0.994399	1.03609	1.02222	1.01011	0.956798
	SD=Standard Deviation
	RSD=Relative Standard Deviation
	apfu=Atoms per formula unit
[truncated: 27 more columns]

## Sheet: 日光榴石
		Data	1	2	3	4	5	6	7	8	9	10	11	12	13	14	15	16	17	18	19	20	21	22	23	24	25	26	27	28	29	30	31	32	33	34	35	36	37	38	39	40	41	42	43	44	45	46	47
	分子量		Mass%	Mass%	Mass%	Mass%	Mass%	Mass%	Mass%	Mass%	Mass%	Mass%	Mass%	Mass%	Mass%	Mass%	Mass%	Mass%	Mass%	Mass%	Mass%	Mass%	Mass%	Mass%	Mass%	Mass%	Mass%	Mass%	Mass%	Mass%	Mass%	Mass%	Mass%	Mass%	Mass%	Mass%	Mass%	Mass%	Mass%	Mass%	Mass%	Mass%	Mass%	Mass%	Mass%	Mass%	Mass%	Mass%	Mass%
	25.012	BeO	11.205	11.677	11.368	11.356	11.478	11.851	11.575	11.434	11.253	11.37	11.456	11.724	11.51	11.441	11.707	12.148	11.234	11.784	11.477	11.165	12.088	11.756	11.497	12.084	11.668	11.073	11.034	11.739	11.703	11.171	11.465	11.626	11.678	11.169	11.963	11.849	11.13	12.319	11.498	11.868	11.347	12.143	11.636	11.285	11.556	11.797	11.628
	60.085	SiO2	30.545	30.342	30.03	30.1	30.257	30.813	31.102	30.484	30.089	29.677	29.944	30.979	30.892	30.177	30.184	30.461	30.135	29.966	30.887	31.054	30.753	31.14	31.225	31.143	31.132	30.911	31.228	30.447	31.082	30.545	30.085	30.091	30.809	30.357	30.459	30.184	30.768	30.584	30.887	30.651	30.587	30.75	30.176	30.677	30.563	30.661	30.575
	80.07	SO3	13.954	13.429	12.948	12.785	12.952	12.813	13.608	13.543	12.939	12.879	12.964	13.853	13.166	13.045	13.072	12.996	12.73	12.407	14.29	14.24	13.868	13.558	14.169	14.44	12.862	14.664	13.596	13.645	13.352	14.005	13.684	13.885	13.845	13.096	14.176	13.351	13.552	12.577	13.753	13.137	12.828	12.671	13.444	13.385	14.404	12.84	13.863
		S	5.57672	5.3669	5.17467	5.10953	5.17627	5.12072	5.43844	5.41246	5.17108	5.1471	5.18107	5.53636	5.2618	5.21344	5.22423	5.19386	5.08755	4.95846	5.711	5.69102	5.54235	5.41846	5.66265	5.77095	5.1403	5.86047	5.43365	5.45323	5.33613	5.5971	5.46881	5.54914	5.53316	5.23382	5.66544	5.33573	5.41606	5.0264	5.49639	5.25021	5.12671	5.06397	5.3729	5.34932	5.75656	5.13151	5.54035
	70.94	MnO	37.178	32.971	28.437	33.708	34.28	37.827	30.966	24.642	20.868	23.252	23.754	30.267	31.368	30.946	24.556	26.041	27.278	28.499	31.428	38.437	34.867	39.443	38.454	33.437	32.056	33.883	25.6	26.658	28.95	27.847	28.401	27.688	27.196	29.341	31.951	29.201	26.822	39.823	26.665	33.605	29.427	37.959	27.241	26.186	32.523	31.486	34.252
	35.45	Cl	0	0.001	0.009	0	0	0.01	0.003	0.012	0	0	0	0.01	0.014	0	0.013	0	0.004	0	0	0	0	0.008	0.003	0.003	0	0.004	0	0	0.001	0.004	0	0.003	0.012	0	0	0.003	0	0.014	0.011	0.001	0	0	0.002	0	0	0.009	0.003
	71.85	FeO	12.017	2.137	3.162	1.922	2.325	2.069	13.87	12.986	7.685	11.427	11.637	13.767	13.735	1.966	2.763	3.14	3.129	3.192	3.688	2.55	4.18	2.532	9.715	2.293	2.351	3.215	19.657	3.447	17.622	17.87	3.831	3.733	18.012	3.428	3.809	3.57	18.503	2.2	18.979	2.232	2.189	2.514	3.722	18.787	3.325	2.053	2.132
	40.31	MgO	0.055	0.042	0.055	0.032	0.051	0	0.006	0.01	0.014	0.12	0.122	0.014	0.001	0.011	0.008	0.081	0.148	0.035	0.001	0.04	0.005	0.021	0.037	0.023	0.077	0.046	0.077	0.054	0.047	0.061	0.027	0.096	0.02	0.032	0.024	0.038	0.052	0.059	0.072	0.06	0.083	0.061	0.095
	81.39	ZnO	3.438	17.582	22.645	19.327	17.392	13.315	8.339	15.123	25.883	20.651	19.395	9.356	8.45	21.884	25.522	23.537	24.974	21.808	18.499	11.24	12.759	9.452	2.467	14.843	18.007	13.443	7.213	22.442	6.307	8.099	21.504	20.904	7.322	22.158	16.168	19.426	7.929	10.192	6.897	17.851	22.907	12.947	21.86	8.717	15.624	19.358	17.028
		TotaI(-O)	100.015	100.119	100.881	101.555	100.959	101.006	101.299	100.103	100.963	101.644	101.489	101.653	101.232	101.638	99.9772	100.602	101.99	100.242	101.691	100.177	100.194	99.7705	99.0606	99.597	100.431	98.4355	100.243	100.24	101.048	101.194	100.782	99.6901	100.582	101.719	100.039	99.6067	100.62	100.217	100.505	101.518	101.667	101.438	100.105	101.001	99.3476	100.496	101.158
		阳离子
		Be	0.447985	0.466856	0.454502	0.454022	0.4589	0.473813	0.462778	0.457141	0.449904	0.454582	0.45802	0.468735	0.460179	0.45742	0.468055	0.485687	0.449144	0.471134	0.45886	0.446386	0.483288	0.470014	0.459659	0.483128	0.466496	0.442708	0.441148	0.469335	0.467895	0.446626	0.45838	0.464817	0.466896	0.446546	0.47829	0.473733	0.444986	0.492524	0.459699	0.474492	0.453662	0.485487	0.465217	0.451183	0.462018	0.471654	0.464897
		Si	0.508363	0.504985	0.499792	0.500957	0.50357	0.512824	0.517633	0.507348	0.500774	0.493917	0.498361	0.515586	0.514138	0.502238	0.502355	0.506965	0.501539	0.498727	0.514055	0.516834	0.511825	0.518266	0.51968	0.518316	0.518133	0.514455	0.51973	0.506732	0.5173	0.508363	0.500707	0.500807	0.512757	0.505234	0.506932	0.502355	0.512075	0.509012	0.514055	0.510127	0.509062	0.511775	0.502222	0.51056	0.508663	0.510294	0.508862
		S	0.174273	0.167716	0.161709	0.159673	0.161758	0.160022	0.169951	0.16914	0.161596	0.160847	0.161908	0.173011	0.164431	0.16292	0.163257	0.162308	0.158986	0.154952	0.178469	0.177844	0.173198	0.169327	0.176958	0.180342	0.160634	0.18314	0.169801	0.170413	0.166754	0.174909	0.1709	0.173411	0.172911	0.163557	0.177045	0.166742	0.169252	0.157075	0.171762	0.164069	0.16021	0.158249	0.167903	0.167166	0.179893	0.16036	0.173136
		Mn	0.524077	0.464773	0.40086	0.475162	0.483225	0.533225	0.43651	0.347364	0.294164	0.32777	0.334846	0.426656	0.442176	0.436228	0.346152	0.367085	0.384522	0.401734	0.443022	0.541824	0.4915	0.556005	0.542064	0.471342	0.451875	0.477629	0.360868	0.375782	0.408091	0.392543	0.400352	0.390302	0.383366	0.413603	0.450395	0.41163	0.378094	0.561362	0.375881	0.47371	0.414815	0.535086	0.384001	0.369129	0.458458	0.44384	0.482831
		Cl	0	2.82087e-05	0.000253879	0	0	0.000282087	8.46262e-05	0.000338505	0	0	0	0.000282087	0.000394922	0	0.000366714	0	0.000112835	0	0	0	0	0.00022567	8.46262e-05	8.46262e-05	0	0.000112835	0	0	2.82087e-05	0.000112835	0	8.46262e-05	0.000338505	0	0	8.46262e-05	0	0.000394922	0.000310296	2.82087e-05	0	0	5.64175e-05	0	0	0.000253879	8.46262e-05
		Fe	0.167251	0.0297425	0.0440084	0.0267502	0.0323591	0.0287961	0.193041	0.180738	0.106959	0.15904	0.161962	0.191608	0.191162	0.0273626	0.0384551	0.0437022	0.0435491	0.0444259	0.0513292	0.0354906	0.0581768	0.0352401	0.135212	0.0319137	0.0327209	0.044746	0.273584	0.0479749	0.245261	0.248713	0.0533194	0.0519555	0.250689	0.0477105	0.0530132	0.0496868	0.257523	0.0306193	0.264148	0.0310647	0.0304662	0.0349896	0.0518024	0.261475	0.046277	0.0285734	0.0296729
		Mg	0.00136443	0.00104193	0.00136443	0.000793848	0.00126519	0	0.000148846	0.000248077	0.000347308	0.00297693	0.00302654	0.000347308	2.48077e-05	0.000272885	0.000198462	0.00200943	0.00367155	0.000868271	2.48077e-05	0.00099231	0.000124039	0.000520963	0.000917886	0.000570578	0.0019102	0.00114116	0.0019102	0.00133962	0.00116596	0.00151327	0.000669809	0.00238154	0.000496155	0.000793848	0.000595386	0.000942694	0.00129	0.00146366	0.00178616	0.00148846	0.00205904	0.00151327	0.00235674	0	0	0	0
		Zn	0.0422411	0.216022	0.278228	0.237462	0.213687	0.163595	0.102457	0.185809	0.318012	0.253729	0.238297	0.114953	0.103821	0.268878	0.313577	0.289188	0.306844	0.267944	0.227288	0.138101	0.156764	0.116132	0.0303108	0.182369	0.221243	0.165168	0.0886227	0.275734	0.0774911	0.0995085	0.264209	0.256837	0.0899619	0.272245	0.198648	0.238678	0.0974198	0.125224	0.0847401	0.219327	0.281447	0.159074	0.268583	0.107102	0.191965	0.237842	0.209215
	3	系数	5.90129	5.94078	6.0025	5.98854	5.95746	5.84997	5.79561	5.9131	5.99073	6.0739	6.01974	5.81862	5.83501	5.97326	5.97187	5.91757	5.98158	6.01532	5.83595	5.80457	5.86138	5.78854	5.77278	5.78798	5.79002	5.83142	5.77222	5.92029	5.79934	5.90129	5.99152	5.99033	5.85073	5.93784	5.91796	5.97187	5.85852	5.89377	5.83595	5.88088	5.89319	5.86195	5.97346	5.8759	5.89782	5.87897	5.8955
		分子式
		Be	2.64369	2.77349	2.72815	2.71893	2.73388	2.77179	2.68208	2.70312	2.69525	2.76108	2.75716	2.72739	2.68515	2.73229	2.79517	2.87408	2.68659	2.83402	2.67788	2.59108	2.83273	2.7207	2.65351	2.79633	2.70102	2.58161	2.54641	2.7786	2.71348	2.63567	2.74639	2.78441	2.73168	2.65152	2.8305	2.82907	2.60696	2.90282	2.68278	2.79043	2.67352	2.8459	2.77895	2.65111	2.7249	2.77284	2.7408
		Si	3	3	3	3	3	3	3	3	3	3	3	3	3	3	3	3	3	3	3	3	3	3	3	3	3	3	3	3	3	3	3	3	3	3	3	3	3	3	3	3	3	3	3	3	3	3	3
		S	1.02843	0.996362	0.970655	0.956207	0.96367	0.936126	0.984971	1.00014	0.968078	0.976966	0.974646	1.00669	0.959457	0.973163	0.974951	0.960468	0.950987	0.932085	1.04154	1.03231	1.01518	0.980154	1.02154	1.04382	0.930077	1.06796	0.980132	1.0089	0.967063	1.03219	1.02395	1.03879	1.01166	0.971175	1.04774	0.99576	0.991566	0.925764	1.0024	0.964871	0.944147	0.927648	1.00296	0.982252	1.06097	0.942749	1.02072
		Mn	3.09273	2.76111	2.40616	2.84553	2.8788	3.11935	2.52984	2.054	1.76226	1.99084	2.01569	2.48255	2.5801	2.6057	2.06717	2.17225	2.30005	2.41656	2.58546	3.14505	2.88087	3.21846	3.12921	2.72812	2.61637	2.78525	2.08301	2.22474	2.36666	2.31651	2.39872	2.33804	2.24297	2.45591	2.66542	2.4582	2.21507	3.30854	2.19362	2.78583	2.44459	3.13665	2.29381	2.16896	2.7039	2.60932	2.84653
		Cl	0	0.000167582	0.00152391	0	0	0.0016502	0.00049046	0.00200161	0	0	0	0.00164136	0.00230437	0	0.00218997	0	0.000674932	0	0	0	0	0.0013063	0.000488528	0.000489815	0	0.000657988	0	0	0.000163592	0.000665872	0	0.000506939	0.0019805	0	0	0.000505377	0	0.00232758	0.00181087	0.000165892	0	0	0.000337007	0	0	0.00149254	0.000498914
		Fe	0.986998	0.176694	0.26416	0.160194	0.192778	0.168456	1.11879	1.06872	0.640762	0.96599	0.974971	1.11489	1.11543	0.163444	0.229649	0.25861	0.260492	0.267236	0.299554	0.206008	0.340996	0.203988	0.78055	0.184716	0.189455	0.260933	1.57919	0.284025	1.42235	1.46773	0.319465	0.31123	1.46671	0.283297	0.31373	0.296724	1.5087	0.180463	1.54155	0.182688	0.179543	0.205107	0.309439	1.5364	0.272933	0.167982	0.174937
		Mg	0.00805188	0.00618984	0.00818996	0.00475399	0.00753735	0	0.000862656	0.00146691	0.00208063	0.0180816	0.018219	0.00202086	0.000144753	0.00163001	0.00118519	0.0118909	0.0219617	0.00522293	0.000144777	0.00575993	0.000727038	0.00301561	0.00529875	0.00330249	0.0110601	0.00665456	0.0110261	0.00793092	0.00676182	0.00893026	0.00401318	0.0142662	0.00290287	0.00471374	0.00352347	0.00562965	0.00755751	0.00862645	0.0104239	0.00875349	0.0121343	0.00887073	0.0140779	0	0	0	0
		Zn	0.249277	1.28334	1.67006	1.42205	1.27303	0.957025	0.593802	1.09871	1.90512	1.54112	1.43449	0.668866	0.605797	1.60608	1.87264	1.71129	1.83541	1.61177	1.32644	0.801614	0.918852	0.672235	0.174978	1.05555	1.281	0.963162	0.51155	1.63243	0.449397	0.587229	1.58302	1.53854	0.526342	1.61655	1.17559	1.42535	0.570736	0.738043	0.494539	1.28984	1.65862	0.932482	1.60437	0.629318	1.13217	1.39827	1.23343
[truncated: 2 more columns]

## Sheet: 香花石
	Data	1	2	3	4	5	6	7	8	9	10	11	12	13	14	15	16	17	18	19	20	21	22	23	24	25	26	27	28	29	30	31	32	33	34	35	36	37	38	39	40	41	42	43	44	45	46	47	48
101.96	Al2O3	0.006	0.009	0.026	0.005	0.011	0.026	0.016	0.021	0.016	0.017	0.003	0.016	0.016	0.024	0.014	0.019	0.008	0.021	0.019	0.009	0.013	0	0.015	0.014	0.013	0.032	0.029	0.017	0.011	0.007	0.01	0.004	0.024	0.014	0	0.007	0.013	0.004	0.002	0.008	0.024	0.019	0.011	0.016	0.013	0.085	0.1	0.027
19	F	7.385	7.434	7.469	7.573	7.42	7.437	7.455	7.464	7.43	7.504	7.321	7.341	7.393	7.422	7.476	7.357	7.463	7.392	7.554	7.436	7.446	7.445	7.431	7.487	7.395	7.126	7.441	7.523	7.492	7.426	7.47	7.282	7.536	7.522	7.376	7.245	7.301	7.426	7.443	7.245	7.448	7.371	7.258	7.365	7.397	7.117	7.41	7.459
60.085	SiO2	37.143	37.735	37.285	37.292	37.392	37.572	37.1	37.075	36.887	37.641	37.337	37.411	37.556	37.087	37.182	37.586	37.24	37.199	36.98	37.076	37.18	37.168	37.271	37.339	37.186	37.202	37.16	37.217	37.133	37.198	37.312	37.219	37.247	37.243	37.232	37.335	37.378	37.311	37.427	37.266	37.318	37.336	37.276	37.296	37.379	37.247	37.458	37.403
56.08	CaO	32.704	32.797	33.019	33.466	32.955	33.105	33.392	32.897	33.132	33.205	32.562	33.148	32.451	33.065	33.469	32.655	33.207	32.779	33.106	32.601	32.618	32.531	33.372	32.536	32.727	33.236	32.389	32.545	33.401	33.073	33.129	32.354	33.242	33.259	33.094	33.214	33.128	33.124	33.113	33.147	33.063	32.978	33.171	32.909	32.914	32.682	33.118	32.866
71.85	FeO	0	0	0	0	0.003	0	0	0.038	0	0.028	0.003	0	0	0	0.001	0.042	0.009	0.026	0	0	0	0.04	0	0.018	0	0	0.016	0	0	0.026	0.021	0.006	0	0.003	0.006	0	0.036	0	0.014	0	0	0.036	0	0	0.067	0	0	0
61.98	Na2O	0.064	0.068	0.067	0.061	0.045	0	0.026	0.063	0.055	0.052	0.032	0.07	0.06	0.046	0.044	0.039	0.034	0.074	0.066	0.059	0.053	0.022	0.048	0.035	0.039	0.072	0.047	0.048	0.044	0.05	0.029	0.058	0.024	0.039	0.069	0.059	0.055	0.039	0.067	0.063	0.028	0.064	0.073	0.068	0.082	0.134	0.158	0.028
25.012	BeO	16.493	16.517	16.519	15.694	15.51	16.177	15.355	15.813	16.59	16.347	16.247	16.636	16.603	16.387	16.586	15.212	15.888	17.035	16.433	15.96	16.058	16.64	16	15.826	16.78	15.18	16.151	16.222	16.763	15.524	16.036	16.409	15.937	15.756	16.196	16.785	16.433	16.317	16.562	16.559	16.244	17.198	17.279	15.995	15.897	16.44	15.778	17.773
29.882	Li2O*	6.15743	6.25557	6.18097	6.18213	6.19871	6.22855	6.1503	6.14615	6.11499	6.23998	6.18959	6.20186	6.22589	6.14814	6.16389	6.23087	6.17351	6.16671	6.13041	6.14632	6.16356	6.16157	6.17865	6.18992	6.16456	6.16721	6.16025	6.1697	6.15577	6.16655	6.18544	6.17003	6.17467	6.17401	6.17218	6.18926	6.19639	6.18528	6.20451	6.17782	6.18644	6.18942	6.17948	6.18279	6.19655	6.17467	6.20965	6.20053
19	F(-O)	-3.1017	-3.12228	-3.13698	-3.18066	-3.1164	-3.12354	-3.1311	-3.13488	-3.1206	-3.15168	-3.07482	-3.08322	-3.10506	-3.11724	-3.13992	-3.08994	-3.13446	-3.10464	-3.17268	-3.12312	-3.12732	-3.1269	-3.12102	-3.14454	-3.1059	-2.99292	-3.12522	-3.15966	-3.14664	-3.11892	-3.1374	-3.05844	-3.16512	-3.15924	-3.09792	-3.0429	-3.06642	-3.11892	-3.12606	-3.0429	-3.12816	-3.09582	-3.04836	-3.0933	-3.10674	-2.98914	-3.1122	-3.13278
	H2O	1.02344	1.1789	0.89573	0.660822	1.05657	1.09911	0.84266	0.810363	0.801455	0.978105	1.258	1.24547	1.19194	0.91262	0.832274	1.28714	0.888818	1.03293	0.558401	0.875309	0.900246	0.897022	0.976359	0.879305	1.02011	1.6448	0.902531	0.740591	0.772829	0.954428	0.905819	1.2944	0.724691	0.754932	1.08466	1.43092	1.32206	1.00605	1.01994	1.40024	0.958903	1.14321	1.37491	1.13887	1.10321	1.68519	1.10921	0.972519
	Total	97.8742	98.8722	98.3247	97.7533	97.4749	98.5211	97.2059	97.1926	97.9058	98.8604	97.8778	98.9861	98.3918	97.9745	98.6282	97.3381	97.7769	98.621	97.6741	97.0395	97.3045	97.7777	98.171	97.1797	98.2188	97.6671	97.1706	97.3226	98.626	97.3061	97.9609	97.738	97.7442	97.6057	98.1319	99.2223	98.796	98.2934	98.7264	98.8232	98.1422	99.2388	99.574	97.8774	97.942	98.5757	98.2287	99.5963
		4.2833	4.31172	4.33202	4.39234	4.3036	4.31346	4.3239	4.32912	4.3094	4.35232	4.24618	4.25778	4.28794	4.30476	4.33608	4.26706	4.32854	4.28736	4.38132	4.31288	4.31868	4.3181	4.30998	4.34246	4.2891	4.13308	4.31578	4.36334	4.34536	4.30708	4.3326	4.22356	4.37088	4.36276	4.27808	4.2021	4.23458	4.30708	4.31694	4.2021	4.31984	4.27518	4.20964	4.2717	4.29026	4.12786	4.2978	4.32622
	Al	0.000117693	0.00017654	0.000510004	9.80777e-05	0.000215771	0.000510004	0.000313849	0.000411926	0.000313849	0.000333464	5.88466e-05	0.000313849	0.000313849	0.000470773	0.000274617	0.000372695	0.000156924	0.000411926	0.000372695	0.00017654	0.000255002	0	0.000294233	0.000274617	0.000255002	0.000627697	0.000568851	0.000333464	0.000215771	0.000137309	0.000196155	7.84621e-05	0.000470773	0.000274617	0	0.000137309	0.000255002	7.84621e-05	3.92311e-05	0.000156924	0.000470773	0.000372695	0.000215771	0.000313849	0.000255002	0.00166732	0.00196155	0.000529619
	Si	0.618174	0.628027	0.620538	0.620654	0.622318	0.625314	0.617459	0.617043	0.613914	0.626463	0.621403	0.622635	0.625048	0.617242	0.618823	0.625547	0.619789	0.619106	0.615461	0.617059	0.61879	0.61859	0.620305	0.621436	0.61889	0.619156	0.618457	0.619406	0.618008	0.61909	0.620987	0.619439	0.619905	0.619839	0.619655	0.62137	0.622085	0.62097	0.622901	0.620221	0.621087	0.621386	0.620388	0.620721	0.622102	0.619905	0.623417	0.622501
	Ca	0.583167	0.584825	0.588784	0.596755	0.587643	0.590317	0.595435	0.586608	0.590799	0.592101	0.580635	0.591084	0.578655	0.589604	0.596808	0.582293	0.592136	0.584504	0.590335	0.58133	0.581633	0.580082	0.595078	0.580171	0.583577	0.592653	0.57755	0.580332	0.595596	0.589747	0.590745	0.576926	0.59276	0.593063	0.590121	0.592261	0.590728	0.590656	0.59046	0.591066	0.589568	0.588053	0.591494	0.586822	0.586912	0.582775	0.590549	0.586056
	Fe	0	0	0	0	4.17537e-05	0	0	0.00052888	0	0.000389701	4.17537e-05	0	0	0	1.39179e-05	0.000584551	0.000125261	0.000361865	0	0	0	0.000556715	0	0.000250522	0	0	0.000222686	0	0	0.000361865	0.000292276	8.35073e-05	0	4.17537e-05	8.35073e-05	0	0.000501044	0	0.00019485	0	0	0.000501044	0	0	0.000932498	0	0	0
	Na	0.00103259	0.00109713	0.00108099	0.000984188	0.000726041	0	0.00041949	0.00101646	0.000887383	0.00083898	0.000516296	0.0011294	0.000968054	0.000742175	0.000709906	0.000629235	0.000548564	0.00119393	0.00106486	0.00095192	0.000855115	0.000354953	0.000774443	0.000564698	0.000629235	0.00116167	0.000758309	0.000774443	0.000709906	0.000806712	0.000467893	0.000935786	0.000387222	0.000629235	0.00111326	0.00095192	0.000887383	0.000629235	0.00108099	0.00101646	0.000451759	0.00103259	0.0011778	0.00109713	0.00132301	0.00216199	0.00254921	0.000451759
	Be	0.659403	0.660363	0.660443	0.627459	0.620102	0.64677	0.613905	0.632217	0.663282	0.653566	0.649568	0.665121	0.663801	0.655166	0.663122	0.608188	0.635215	0.681073	0.657005	0.638094	0.642012	0.665281	0.639693	0.632736	0.670878	0.606909	0.64573	0.648569	0.670198	0.620662	0.641132	0.656045	0.637174	0.629938	0.647529	0.671078	0.657005	0.652367	0.662162	0.662042	0.649448	0.68759	0.690828	0.639493	0.635575	0.657285	0.630817	0.710579
	Li	0.412116	0.418685	0.413692	0.413769	0.414879	0.416876	0.411639	0.411362	0.409276	0.417642	0.414269	0.41509	0.416699	0.411495	0.412549	0.417031	0.413192	0.412738	0.410308	0.411373	0.412527	0.412394	0.413536	0.414291	0.412593	0.412771	0.412305	0.412937	0.412005	0.412726	0.413991	0.412959	0.41327	0.413226	0.413104	0.414246	0.414724	0.41398	0.415267	0.413481	0.414058	0.414258	0.413592	0.413814	0.414735	0.41327	0.415611	0.415001
	F	0.777368	0.782526	0.786211	0.797158	0.781053	0.782842	0.784737	0.785684	0.782105	0.789895	0.770632	0.772737	0.778211	0.781263	0.786947	0.774421	0.785579	0.778105	0.795158	0.782737	0.783789	0.783684	0.782211	0.788105	0.778421	0.750105	0.783263	0.791895	0.788632	0.781684	0.786316	0.766526	0.793263	0.791789	0.776421	0.762632	0.768526	0.781684	0.783474	0.762632	0.784	0.775895	0.764	0.775263	0.778632	0.749158	0.78	0.785158
3	系数	4.853	4.77686	4.83452	4.83361	4.82068	4.79759	4.85863	4.8619	4.88668	4.78879	4.82778	4.81824	4.79963	4.86033	4.84791	4.7958	4.84036	4.84569	4.87439	4.86177	4.84817	4.84974	4.83633	4.82753	4.84739	4.8453	4.85078	4.84335	4.85431	4.84583	4.83102	4.84309	4.83945	4.83997	4.8414	4.82804	4.82249	4.83115	4.81618	4.83698	4.83024	4.82791	4.83569	4.83309	4.82236	4.83945	4.81219	4.81927
	分子式
	Al	0.000571165	0.000843307	0.00246562	0.000474069	0.00104016	0.00244679	0.00152487	0.00200274	0.00153368	0.00159689	0.000284099	0.0015122	0.00150636	0.00228811	0.00133132	0.00178737	0.00075957	0.00199607	0.00181666	0.000858296	0.00123629	0	0.00142301	0.00132572	0.00123609	0.00304138	0.00275937	0.00161508	0.00104742	0.000665374	0.00094763	0.000379999	0.00227828	0.00132914	0	0.000662933	0.00122974	0.000379062	0.000188944	0.00075904	0.00227395	0.00179934	0.0010434	0.00151686	0.00122971	0.00806891	0.00943937	0.00255238
	Si	3	3	3	3	3	3	3	3	3	3	3	3	3	3	3	3	3	3	3	3	3	3	3	3	3	3	3	3	3	3	3	3	3	3	3	3	3	3	3	3	3	3	3	3	3	3	3	3
	Ca	2.83011	2.79363	2.84649	2.88448	2.83284	2.8321	2.893	2.85203	2.88705	2.83545	2.80318	2.84798	2.77733	2.86567	2.89327	2.79256	2.86615	2.83233	2.87753	2.82629	2.81986	2.81324	2.878	2.80079	2.82882	2.87159	2.80157	2.81075	2.8912	2.85781	2.8539	2.7941	2.86863	2.87041	2.85701	2.85946	2.84878	2.85355	2.84376	2.85898	2.84776	2.83907	2.86028	2.83617	2.8303	2.82031	2.84183	2.82436
	Fe	0	0	0	0	0.000201281	0	0	0.00257136	0	0.0018662	0.000201578	0	0	0	6.74727e-05	0.00280339	0.000606308	0.00175349	0	0	0	0.00269992	0	0.0012094	0	0	0.0010802	0	0	0.00175353	0.00141199	0.000404433	0	0.000202086	0.000404292	0	0.00241628	0	0.000938434	0	0	0.002419	0	0	0.00449684	0	0	0
	Na	0.00501117	0.00524083	0.00522608	0.00475718	0.00350001	0	0.00203815	0.00494191	0.00433636	0.0040177	0.00249256	0.0054417	0.0046463	0.00360721	0.00344156	0.00301769	0.00265525	0.00578544	0.00519054	0.00462802	0.00414574	0.00172143	0.00374547	0.0027261	0.00305015	0.00562862	0.00367839	0.0037509	0.0034461	0.00390918	0.0022604	0.0045321	0.00187394	0.00304548	0.00538975	0.00459591	0.0042794	0.00303993	0.00520626	0.00491658	0.0021821	0.00498526	0.00569547	0.00530252	0.00638002	0.0104628	0.0122673	0.00217714
	Be	3.20009	3.15447	3.19292	3.03289	2.98932	3.10293	2.98274	3.07377	3.24125	3.12979	3.13598	3.20471	3.186	3.18432	3.21475	2.91675	3.07467	3.30027	3.2025	3.10227	3.11258	3.22644	3.09377	3.05455	3.25201	2.94066	3.13229	3.14125	3.25335	3.00762	3.09732	3.17729	3.08357	3.04888	3.13495	3.23999	3.1684	3.15168	3.18909	3.20229	3.13699	3.31963	3.34063	3.09073	3.06497	3.1809	3.03561	3.42447
	Li	2	2	2	2	2	2	2	2	2	2	2	2	2	2	2	2	2	2	2	2	2	2	2	2	2	2	2	2	2	2	2	2	2	2	2	2	2	2	2	2	2	2	2	2	2	2	2	2
	F	1.88628	1.86901	1.90047	1.92658	1.8826	1.87788	1.90637	1.90996	1.91095	1.89132	1.86022	1.86161	1.86756	1.8986	1.90753	1.85698	1.90124	1.88523	1.93796	1.90274	1.89997	1.90033	1.89152	1.9023	1.88665	1.81724	1.89972	1.91771	1.91413	1.89395	1.89935	1.85618	1.91948	1.91612	1.87948	1.84101	1.8531	1.88822	1.88667	1.84442	1.89346	1.87298	1.84723	1.87346	1.87742	1.81276	1.87675	1.89194
	OH	0.113715	0.130989	0.0995256	0.0734246	0.117396	0.122123	0.0936288	0.0900404	0.0890506	0.108678	0.139778	0.138386	0.132438	0.101402	0.0924749	0.143015	0.0987576	0.11477	0.0620445	0.0972566	0.100027	0.0996691	0.108484	0.0977006	0.113345	0.182756	0.100281	0.0822879	0.0858699	0.106048	0.100647	0.143822	0.0805212	0.0838814	0.120518	0.158991	0.146895	0.111784	0.113327	0.155582	0.106545	0.127023	0.152768	0.126541	0.122579	0.187244	0.123246	0.108058
[truncated: 18 more columns]

## Sheet: 孟宪民石
分子式		1	2	3	4	5	6	7	8	9	10	11	12	13	14	15	16	17	18	19	20	21	22	23	24	25	26	27	28	29	30	31	32	33	34	35	36	37	38	39	40	41	42	43	44	45	46	47	48
40.31	MgO	5.641	7.195	7.271	7.214	7.213	6.932	6.707	5.799	5.931	5.91	7.081	7.239	7.02	7.239	7.421	7.361	7.349	7.3	7.133	7.118	6.271	4.399	7.143	7.168	7.239	7.073	7.247	5.957	4.94	7.235	7.268	7.177	5.761	6.163	3.896	3.974	4.943	5.181	5.37	5.736	5.772	7.076	7.058	6.84	4.904	6.443	6.512	4.263
25.012	BeO	4.325	4.111	4.466	4.211	4.203	4.413	4.501	4.271	4.313	4.443	4.212	4.332	4.36	4.09	4.153	4.495	4.173	4.289	4.326	4.276	4.366	4.278	4.212	4.199	4.446	4.409	4.424	4.395	4.413	4.582	4.358	4.549	4.414	4.352	4.05	4.211	4.533	4.463	4.445	4.246	4.136	4.43	4.282	4.57	4.485	4.19	4.331	4.126
56.08	CaO	7.807	8.713	8.714	8.735	8.792	8.527	8.275	7.737	7.946	7.79	8.512	8.795	8.735	8.794	8.911	8.596	8.893	8.881	8.757	8.678	7.789	7.298	8.578	8.439	8.683	8.612	8.544	7.922	7.803	8.825	8.714	8.757	7.875	7.831	7.251	7.636	7.679	7.329	7.431	7.767	7.574	8.739	8.423	8.064	7.543	8.093	8.094	7.63
101.96	Al2O3	37.673	38.751	38.765	38.226	37.126	39.154	39.385	40.373	39.404	38.262	38.829	37.717	38.334	37.653	38.373	38.578	38.128	37.316	39.033	37.756	37.464	40.348	37.243	38.626	37.997	36.759	37.785	39.171	39.321	36.429	38.077	38.28	39.015	37.813	40.026	39.327	39.273	40.238	40.025	38.849	37.874	39.131	39.248	39.343	39.805	39.254	39.149	39.983
81.39	ZnO	1.914	1.74	3.302	1.374	1.62	3.333	2.342	3.568	1.582	3.101	2.269	1.526	2.279	1.43	2.471	2.831	3.136	2.492	0.842	2.936	2.831	1.414	0.9	2.218	1.877	2.382	2.161	3.634	2.632	0.817	2.471	2.74	1.782	1.444	4.228	5.142	2.158	1.347	1.305	1.771	3.084	3.021	2.328	1.153	3.037	0.955	3.566	1.528
61.98	Na2O	1.368	0.816	0.794	0.766	0.787	0.871	1.073	1.478	1.269	1.404	0.875	0.748	0.787	0.67	0.693	0.675	0.706	0.681	0.796	0.796	1.174	1.497	0.763	0.781	0.696	0.683	0.754	1.298	1.382	0.681	0.628	0.691	1.29	1.251	1.686	1.315	1.33	1.565	1.557	1.324	1.392	0.804	0.884	0.892	1.49	1.056	1.088	1.49
150.7	SnO2	27.498	27.13	27.488	27.626	27.017	27.702	27.936	28.092	27.653	27.371	27.606	27.617	27.014	27.479	27.498	27.356	27.695	27.601	27.829	27.399	27.005	26.229	27.243	27.428	26.799	27.158	27.398	27.047	27.308	27.251	26.623	26.62	27.338	27.736	27.619	26.091	26.939	27.337	27.657	27.683	27.101	27.538	27.41	27.524	27.602	27.539	27.696	27.483
71.85	FeO	4.81	4.408	4.952	4.885	4.802	4.149	4.532	4.346	4.959	4.302	4.344	4.79	5.385	5.106	4.876	4.742	4.15	4.595	4.762	5.268	4.977	5.55	4.522	4.413	4.889	4.675	3.98	4.454	4.687	4.972	5.191	5.247	4.624	4.462	4.618	5.599	5.269	4.301	4.691	4.406	5.027	4.116	4.304	4.174	3.806	4.923	4.403	5.187
70.94	MnO	1.195	0.844	0.914	0.987	0.854	0.787	1.022	1.145	1.21	1.085	0.901	0.829	0.98	0.778	0.883	0.804	0.912	0.802	0.922	1.008	1.047	1.738	0.885	0.938	0.931	0.907	0.752	1.03	1.222	0.882	0.954	0.851	1.196	1.093	1.127	1.503	1.228	1.05	1.238	1.071	1.128	0.757	0.936	0.89	1.158	1.173	1.15	1.36
69.62	B2O3*	6.21994	6.37552	6.52279	6.37355	6.25415	6.48974	6.49903	6.53103	6.39789	6.32066	6.41669	6.34164	6.41749	6.30481	6.43194	6.46786	6.41009	6.33259	6.43632	6.39674	6.25817	6.32283	6.21951	6.39048	6.36051	6.252	6.32358	6.41216	6.34023	6.22409	6.38624	6.43384	6.33997	6.24352	6.33064	6.32637	6.3338	6.35918	6.39308	6.29774	6.24725	6.48787	6.45052	6.41192	6.36762	6.37463	6.46967	6.30248
	Total	98.4509	100.084	103.189	100.398	98.6681	102.358	102.272	103.34	100.665	99.9887	101.046	99.9346	101.311	99.5438	101.711	101.906	101.552	100.29	100.836	101.632	99.1822	99.0738	97.7085	100.6	99.9175	98.91	99.3686	101.32	100.048	97.8981	100.67	101.346	99.635	98.3885	100.832	101.124	99.6858	99.1702	100.112	99.1507	99.3352	102.1	101.324	99.8619	100.198	100.001	102.459	99.3525
	阳离子
	Mg	0.13994	0.178492	0.180377	0.178963	0.178938	0.171967	0.166386	0.14386	0.147135	0.146614	0.175664	0.179583	0.17415	0.179583	0.184098	0.18261	0.182312	0.181097	0.176954	0.176581	0.155569	0.109129	0.177202	0.177822	0.179583	0.175465	0.179782	0.14778	0.12255	0.179484	0.180303	0.178045	0.142917	0.15289	0.096651	0.098586	0.122625	0.128529	0.133218	0.142297	0.14319	0.17554	0.175093	0.169685	0.121657	0.159836	0.161548	0.105755
	Be	0.172917	0.164361	0.178554	0.168359	0.168039	0.176435	0.179954	0.170758	0.172437	0.177635	0.168399	0.173197	0.174316	0.163522	0.16604	0.179714	0.16684	0.171478	0.172957	0.170958	0.174556	0.171038	0.168399	0.167879	0.177755	0.176275	0.176875	0.175716	0.176435	0.183192	0.174236	0.181873	0.176475	0.173996	0.161922	0.168359	0.181233	0.178434	0.177715	0.169759	0.165361	0.177115	0.171198	0.182712	0.179314	0.16752	0.173157	0.164961
	Ca	0.139212	0.155367	0.155385	0.15576	0.156776	0.152051	0.147557	0.137964	0.14169	0.138909	0.151783	0.15683	0.15576	0.156812	0.158898	0.153281	0.158577	0.158363	0.156152	0.154743	0.138891	0.130136	0.15296	0.150481	0.154832	0.153566	0.152354	0.141262	0.139141	0.157364	0.155385	0.156152	0.140424	0.13964	0.129297	0.136163	0.136929	0.130688	0.132507	0.138499	0.135057	0.155831	0.150196	0.143795	0.134504	0.144312	0.14433	0.136056
	Al	0.738976	0.760122	0.760396	0.749823	0.728246	0.768027	0.772558	0.791938	0.772931	0.75053	0.761652	0.739839	0.751942	0.738584	0.752707	0.756728	0.747901	0.731973	0.765653	0.740604	0.734876	0.791448	0.730541	0.75767	0.745332	0.721047	0.741173	0.76836	0.771302	0.714574	0.746901	0.750883	0.7653	0.741722	0.785131	0.77142	0.770361	0.78929	0.785112	0.762044	0.742919	0.767576	0.769871	0.771734	0.780796	0.769988	0.767929	0.784288
	Zn	0.0235164	0.0213785	0.0405701	0.0168817	0.0199042	0.040951	0.028775	0.0438383	0.0194373	0.0381005	0.0278781	0.0187492	0.028001	0.0175697	0.03036	0.0347831	0.0385305	0.030618	0.0103453	0.0360732	0.0347831	0.0173731	0.0110579	0.0272515	0.0230618	0.0292665	0.0265512	0.0446492	0.0323381	0.0100381	0.03036	0.0336651	0.0218946	0.0177417	0.0519474	0.0631773	0.0265143	0.0165499	0.0160339	0.0217594	0.0378916	0.0371176	0.028603	0.0141664	0.0373142	0.0117336	0.0438137	0.0187738
	Na	0.0441433	0.0263311	0.0256212	0.0247177	0.0253953	0.0281058	0.0346241	0.0476928	0.0409487	0.0453049	0.0282349	0.0241368	0.0253953	0.0216199	0.0223621	0.0217812	0.0227815	0.0219748	0.0256857	0.0256857	0.0378832	0.0483059	0.0246208	0.0252017	0.0224589	0.0220394	0.0243304	0.0418845	0.044595	0.0219748	0.0202646	0.0222975	0.0416263	0.0403679	0.0544046	0.042433	0.0429171	0.0505002	0.050242	0.0427235	0.0449177	0.0259439	0.0285253	0.0287835	0.04808	0.0340755	0.0351081	0.04808
	Sn	0.182468	0.180027	0.182402	0.183318	0.179277	0.183822	0.185375	0.18641	0.183497	0.181626	0.183185	0.183258	0.179257	0.182342	0.182468	0.181526	0.183776	0.183152	0.184665	0.181812	0.179197	0.174048	0.180776	0.182004	0.17783	0.180212	0.181805	0.179476	0.181208	0.180829	0.176662	0.176642	0.181407	0.184048	0.183271	0.173132	0.178759	0.1814	0.183524	0.183696	0.179834	0.182734	0.181885	0.182641	0.183159	0.182741	0.183782	0.182369
	Fe	0.066945	0.06135	0.0689214	0.0679889	0.0668337	0.0577453	0.0630759	0.0604871	0.0690188	0.0598747	0.0604593	0.0666667	0.0749478	0.0710647	0.0678636	0.0659986	0.0577592	0.0639527	0.066277	0.0733194	0.0692693	0.0772443	0.0629367	0.0614196	0.0680445	0.0650661	0.0553932	0.0619903	0.0652331	0.0691997	0.0722477	0.0730271	0.0643563	0.0621016	0.0642728	0.0779262	0.0733333	0.0598608	0.0652888	0.0613222	0.0699652	0.057286	0.0599026	0.0580932	0.0529715	0.0685177	0.0612804	0.0721921
	Mn	0.0168452	0.0118974	0.0128841	0.0139132	0.0120383	0.0110939	0.0144065	0.0161404	0.0170567	0.0152946	0.0127009	0.0116859	0.0138145	0.010967	0.0124471	0.0113335	0.0128559	0.0113053	0.0129969	0.0142092	0.014759	0.0244996	0.0124753	0.0132224	0.0131238	0.0127855	0.0106005	0.0145193	0.0172258	0.012433	0.013448	0.0119961	0.0168593	0.0154074	0.0158867	0.0211869	0.0173104	0.0148012	0.0174514	0.0150973	0.0159008	0.010671	0.0131942	0.0125458	0.0163237	0.0165351	0.0162109	0.0191711
	B	0.178682	0.183152	0.187383	0.183095	0.179665	0.186433	0.1867	0.187619	0.183795	0.181576	0.184335	0.182179	0.184358	0.181121	0.184773	0.185805	0.184145	0.181919	0.184899	0.183761	0.179781	0.181638	0.17867	0.183582	0.182721	0.179604	0.18166	0.184204	0.182138	0.178802	0.18346	0.184827	0.182131	0.17936	0.181863	0.18174	0.181953	0.182683	0.183656	0.180918	0.179467	0.186379	0.185306	0.184198	0.182925	0.183127	0.185857	0.181054
	ΣO	2.32287	2.38098	2.43598	2.38024	2.33565	2.42363	2.4271	2.43905	2.38933	2.36049	2.39635	2.36832	2.39665	2.35457	2.40204	2.41546	2.39389	2.36494	2.40368	2.3889	2.33715	2.3613	2.32271	2.38656	2.37537	2.33485	2.36158	2.39466	2.3678	2.32442	2.38498	2.40276	2.3677	2.33168	2.36421	2.36262	2.36539	2.37487	2.38753	2.35193	2.33307	2.42293	2.40898	2.39457	2.37802	2.38065	2.41614	2.3537
26	系数	11.193	10.9199	10.6733	10.9233	11.1318	10.7277	10.7124	10.6599	10.8817	11.0147	10.8498	10.9782	10.8485	11.0424	10.8241	10.764	10.861	10.9939	10.8167	10.8837	11.1247	11.0109	11.1938	10.8943	10.9457	11.1356	11.0096	10.8575	10.9807	11.1856	10.9016	10.8209	10.9811	11.1508	10.9973	11.0047	10.9918	10.948	10.8899	11.0548	11.1441	10.7308	10.7929	10.8579	10.9334	10.9214	10.761	11.0464
26	系数	11.193	10.9199	10.6733	10.9233	11.1318	10.7277	10.7124	10.6599	10.8817	11.0147	10.8498	10.9782	10.8485	11.0424	10.8241	10.764	10.861	10.9939	10.8167	10.8837	11.1247	11.0109	11.1938	10.8943	10.9457	11.1356	11.0096	10.8575	10.9807	11.1856	10.9016	10.8209	10.9811	11.1508	10.9973	11.0047	10.9918	10.948	10.8899	11.0548	11.1441	10.7308	10.7929	10.8579	10.9334	10.9214	10.761	11.0464
	分子式
	Mg	1.56636	1.94911	1.92523	1.95486	1.99191	1.84481	1.78238	1.53353	1.60108	1.6149	1.90592	1.97151	1.88927	1.98302	1.9927	1.96561	1.98009	1.99096	1.91406	1.92186	1.73066	1.20161	1.98356	1.93725	1.96566	1.95392	1.97932	1.60452	1.34568	2.00763	1.96558	1.92661	1.56939	1.70484	1.0629	1.08491	1.34787	1.40713	1.45073	1.57306	1.59573	1.88368	1.88977	1.84242	1.33013	1.74564	1.73842	1.16822
	Be	1.93547	1.79481	1.90577	1.83903	1.87058	1.89275	1.92773	1.82026	1.87641	1.95659	1.8271	1.9014	1.89107	1.80566	1.79724	1.93444	1.81205	1.88521	1.87083	1.86065	1.94188	1.88328	1.88503	1.82893	1.94564	1.96294	1.94732	1.90783	1.93738	2.04911	1.89945	1.96803	1.9379	1.94019	1.78071	1.85275	1.99208	1.95349	1.93529	1.87664	1.8428	1.90059	1.84773	1.98387	1.96052	1.82955	1.86334	1.82223
	Ca	1.5582	1.6966	1.65848	1.70141	1.7452	1.63116	1.58068	1.47068	1.54183	1.53003	1.64682	1.72171	1.68975	1.73157	1.71993	1.64991	1.72231	1.74103	1.68905	1.68418	1.54511	1.43291	1.71221	1.63939	1.69474	1.71006	1.67735	1.53376	1.52786	1.76021	1.69394	1.68971	1.54202	1.55709	1.42192	1.49843	1.5051	1.43077	1.44299	1.53107	1.50509	1.67219	1.62106	1.56131	1.4706	1.57609	1.55313	1.50293
	Al	8.27139	8.30045	8.11597	8.19053	8.1067	8.23917	8.27592	8.44197	8.4108	8.26683	8.26379	8.12213	8.15742	8.15571	8.14738	8.14541	8.12295	8.04726	8.28187	8.0605	8.17525	8.71455	8.17755	8.2543	8.15815	8.02932	8.16	8.34247	8.46942	7.99293	8.14239	8.12523	8.40385	8.27077	8.63434	8.48928	8.46768	8.64111	8.54979	8.42421	8.27917	8.2367	8.30916	8.37942	8.5368	8.40936	8.26367	8.66359
	Zn	0.26322	0.233452	0.433019	0.184403	0.221569	0.43931	0.308249	0.467311	0.211511	0.419664	0.302473	0.205833	0.303768	0.194011	0.32862	0.374405	0.41848	0.336612	0.111902	0.392609	0.386951	0.191294	0.12378	0.296887	0.252427	0.325901	0.292317	0.484779	0.355094	0.112282	0.330972	0.364286	0.240427	0.197834	0.571282	0.695249	0.291441	0.181188	0.174608	0.240545	0.422268	0.398301	0.30871	0.153817	0.407973	0.128148	0.471479	0.207384
	Na	0.494097	0.287533	0.273464	0.269998	0.282696	0.301511	0.370906	0.5084	0.445592	0.499019	0.306344	0.26498	0.2755	0.238734	0.242049	0.234453	0.24743	0.24159	0.277836	0.279555	0.421438	0.531891	0.275601	0.274555	0.245827	0.245422	0.267868	0.454761	0.489683	0.245801	0.220916	0.241279	0.457104	0.450132	0.598305	0.466964	0.471737	0.552874	0.54713	0.472297	0.500568	0.278398	0.307872	0.312528	0.52568	0.372153	0.377798	0.531113
	Sn	2.04238	1.96587	1.94684	2.00243	1.99567	1.97199	1.9858	1.98711	1.99676	2.00055	1.98753	2.01185	1.94466	2.01349	1.97506	1.95395	1.99599	2.01356	1.99747	1.97878	1.99351	1.91642	2.02358	1.98281	1.94647	2.00678	2.0016	1.94866	1.98978	2.02268	1.9259	1.91143	1.99205	2.05227	2.01549	1.90527	1.96489	1.98596	1.99855	2.03071	2.00409	1.96088	1.96307	1.9831	2.00255	1.99578	1.97768	2.01453
	Fe	0.749318	0.669936	0.735621	0.742661	0.74398	0.619475	0.675691	0.644786	0.751042	0.6595	0.655973	0.731882	0.813069	0.784722	0.734563	0.710408	0.627323	0.703091	0.716901	0.797985	0.770598	0.850529	0.704502	0.669126	0.744793	0.724553	0.609856	0.673059	0.716303	0.774039	0.787614	0.79022	0.706704	0.69248	0.706828	0.857558	0.806068	0.655354	0.710988	0.677902	0.7797	0.614725	0.646524	0.630771	0.579161	0.74831	0.659438	0.797465
	Mn	0.188549	0.129918	0.137517	0.151977	0.134009	0.119012	0.154328	0.172055	0.185606	0.168465	0.137802	0.128291	0.149866	0.121102	0.134729	0.121994	0.139628	0.12429	0.140584	0.154648	0.164188	0.269762	0.139647	0.14405	0.143648	0.142374	0.116707	0.157643	0.189151	0.139071	0.146604	0.129808	0.185134	0.171804	0.174711	0.233156	0.190273	0.162043	0.190044	0.166897	0.1772	0.114508	0.142405	0.136221	0.178474	0.180587	0.174445	0.211773
	B*	2	2	2	2	2	2	2	2	2	2	2	2	2	2	2	2	2	2	2	2	2	2	2	2	2	2	2	2	2	2	2	2	2	2	2	2	2	2	2	2	2	2	2	2	2	2	2	2
[truncated: 18 more columns]

[truncated: 12 more sheets: S7 (Magnesiotaaffeite-6N3S), S8 (Mengxianminite), 塔菲石, 绿柱石, 羟硅铍石, 硅铍石, 闽江石, S9 (hurlbutite), S10 (Strontiohurlbutite), S11 (Minjiangite), 磷钙铍石, 磷锶铍石]
